# Supplementary material
Source: PubMed Central journal article supplement (PMC4977182)
Supplement: NIHMS4061-supplement-1.pdf [file NIHMS4061-supplement-1.pdf]

| No. | probeset_id | ratio | gene           | gene full name                                                     | gene assignment | ENSEMBL ID        | seqname | start     | stop      |
|-----|-------------|-------|----------------|--------------------------------------------------------------------|-----------------|-------------------|---------|-----------|-----------|
| 1   | 10586448    | 0.131 | 2810417H13 Rik | RIKEN cDNA 2810417H13 gene                                         | NM_026515       | ENSMUST0000045802 | chr9    | 65738130  | 65751358  |
| 2   | 10554445    | 0.147 | Prc1           | protein regulator of cytokinesis 1                                 | NM_145150       | ENSMUST0000047549 | chr7    | 87439351  | 87461145  |
| 3   | 10462796    | 0.157 | Kif11          | kinesin family member 11                                           | NM_010615       | ENSMUST0000012587 | chr19   | 37450893  | 37496349  |
| 4   | 10487480    | 0.159 | Bub1           | budding uninhibited by benzimidazoles 1 homolog (S. cerevisiae)    | NM_001113179    | NM_009772         | chr2    | 127626857 | 127657596 |
| 5   | 10359890    | 0.165 | Nuf2           | NUF2, NDC80 kinetochore complex component, homolog (S. cerevisiae) | NM_023284       | ENSMUST0000111368 | chr1    | 171428065 | 171461595 |
| 6   | 10515836    | 0.17  | Ccnb1          | cyclin B1                                                          | NM_172301       | ENSMUST0000072119 | chr4    | 118614665 | 118615957 |
| 7   | 10390707    | 0.177 | Top2a          | topoisomerase (DNA) II alpha                                       | NM_011623       | ENSMUST0000068031 | chr11   | 98854261  | 98885429  |
| 8   | 10487340    | 0.177 | Ncaph          | non-SMC condensin I                                                | NM_144818       | ENSMUST00         | chr2    | 126929562 | 126959679 |

|    |          |       |           |                                                           |                  |                        |       |           |           |
|----|----------|-------|-----------|-----------------------------------------------------------|------------------|------------------------|-------|-----------|-----------|
|    |          |       |           | complex,<br>subunit H                                     |                  | 000037712              |       |           |           |
| 9  | 10462632 | 0.179 | Kif20b    | kinesin<br>family<br>member 20B                           | NM_183046        | ENSMUST00<br>000087341 | chr19 | 34996851  | 35050233  |
| 10 | 10562637 | 0.18  | Ccnb1     | cyclin B1                                                 | NM_172301        | ENSMUST00<br>000072119 | chr7  | 49361266  | 49362555  |
| 11 | 10411739 | 0.182 | Ccnb1     | cyclin B1                                                 | NM_172301        | ENSMUST00<br>000072119 | chr13 | 101548687 | 101556441 |
| 12 | 10385248 | 0.183 | Hmmr      | hyaluronan<br>mediated<br>motility<br>receptor<br>(RHAMM) | NM_013552        | ENSMUST00<br>000020579 | chr11 | 40514897  | 40546924  |
| 13 | 10576883 | 0.184 | Shcbp1    | Shc SH2-<br>domain<br>binding<br>protein 1                | NM_011369        | ENSMUST00<br>000022945 | chr8  | 4735976   | 4779554   |
| 14 | 10404061 | 0.184 | Hist1h2bb | histone<br>cluster 1,<br>H2bb                             | NM_175664        | ENSMUST00<br>000099703 | chr13 | 23838603  | 23839393  |
| 15 | 10474984 | 0.186 | Nusap1    | nucleolar<br>and spindle<br>associated<br>protein 1       | NM_133851        | NM_001042<br>652       | chr2  | 119444034 | 119476980 |
| 16 | 10525591 | 0.187 | Kntc1     | kinetochore<br>associated 1                               | NM_001042<br>421 | ENSMUST00<br>000031366 | chr5  | 124199735 | 124271602 |
| 17 | 10361375 | 0.188 | Fbxo5     | F-box<br>protein 5                                        | NM_025995        | ENSMUST00<br>000019907 | chr10 | 4541076   | 4547383   |

|    |          |       |                   |                                                             |                  |                        |       |           |           |
|----|----------|-------|-------------------|-------------------------------------------------------------|------------------|------------------------|-------|-----------|-----------|
| 18 | 10594774 | 0.188 | Ccnb2             | cyclin B2                                                   | NM_007630        | ENSMUST00<br>000034742 | chr9  | 70255496  | 70269361  |
| 19 | 10568714 | 0.188 | Mki67             | antigen<br>identified by<br>monoclonal<br>antibody Ki<br>67 | NM_001081<br>117 | BC053453               | chr7  | 142881471 | 142907979 |
| 20 | 10601011 | 0.189 | Kif4              | kinesin<br>family<br>member 4                               | NM_008446        | ENSMUST00<br>000048962 | chrX  | 97821076  | 97922553  |
| 21 | 10394978 | 0.189 | Rrm2              | ribonucleotid<br>e reductase<br>M2                          | NM_009104        | ENSMUST00<br>000020980 | chr12 | 25393119  | 25398973  |
| 22 | 10500327 | 0.191 | Hist2h3c2         | histone<br>cluster 2,<br>H3c2                               | NM_054045        | BC015270               | chr3  | 96042039  | 96043050  |
| 23 | 10404069 | 0.191 | Hist1h1a          | histone<br>cluster 1,<br>H1a                                | NM_030609        | ENSMUST00<br>000055770 | chr13 | 23855537  | 23856283  |
| 24 | 10399391 | 0.192 | Gen1              | Gen<br>homolog 1,<br>endonucleas<br>e<br>(Drosophila)       | NM_177331        | ENSMUST00<br>000052581 | chr12 | 11246547  | 11272593  |
| 25 | 10497122 | 0.193 | Depdc1a           | DEP domain<br>containing<br>1a                              | NM_001172<br>092 | NM_029523              | chr3  | 159158409 | 159192540 |
| 26 | 10350838 | 0.193 | 2810417H13<br>Rik | RIKEN cDNA<br>2810417H13<br>gene                            | NM_026515        | ENSMUST00<br>000045802 | chr1  | 158723643 | 158723975 |

|    |          |       |           |                                                                              |              |                   |       |           |           |
|----|----------|-------|-----------|------------------------------------------------------------------------------|--------------|-------------------|-------|-----------|-----------|
| 27 | 10451805 | 0.195 | Sgol1     | shugoshin-like 1 ( <i>S. pombe</i> )                                         | NM_028232    | ENSMUST0000024736 | chr17 | 53815385  | 53828637  |
| 28 | 10384373 | 0.195 | Figl1     | fidgetin-like 1                                                              | NM_001163359 | NM_021891         | chr11 | 11700291  | 11708935  |
| 29 | 10416037 | 0.198 | Pbk       | PDZ binding kinase                                                           | NM_023209    | ENSMUST0000022612 | chr14 | 66424676  | 66436659  |
| 30 | 10404063 | 0.198 | Hist1h2ab | histone cluster 1, H2ab                                                      | NM_175660    | BC117110          | chr13 | 23842957  | 23843462  |
| 31 | 10515431 | 0.198 | Kif2c     | kinesin family member 2C                                                     | NM_134471    | ENSMUST0000065896 | chr4  | 116832266 | 116855189 |
| 32 | 10485963 | 0.199 | Arhgap11a | Rho GTPase activating protein 11A                                            | NM_181416    | ENSMUST0000040215 | chr2  | 113670173 | 113688818 |
| 33 | 10497520 | 0.199 | Ect2      | ect2 oncogene                                                                | NM_007900    | NM_001177625      | chr3  | 26996144  | 27052761  |
| 34 | 10497831 | 0.199 | Ccna2     | cyclin A2                                                                    | NM_009828    | ENSMUST0000029270 | chr3  | 36463787  | 36470920  |
| 35 | 10483401 | 0.2   | Spc25     | SPC25, NDC80 kinetochore complex component, homolog ( <i>S. cerevisiae</i> ) | NM_025565    | ENSMUST0000112319 | chr2  | 69031952  | 69044214  |
| 36 | 10521731 | 0.2   | Ncapg     | non-SMC condensin I complex,                                                 | NM_019438    | ENSMUST0000117396 | chr5  | 46061272  | 46091191  |

|    |          |       |                |                                             |              |                   |       |           |           |
|----|----------|-------|----------------|---------------------------------------------|--------------|-------------------|-------|-----------|-----------|
|    |          |       |                | subunit G                                   |              |                   |       |           |           |
| 37 | 10563883 | 0.202 | Depdc1a        | DEP domain containing 1a                    | NM_001172092 | NM_029523         | chr7  | 65133346  | 65136664  |
| 38 | 10436106 | 0.202 | C330027C09 Rik | RIKEN cDNA C330027C09 gene                  | NM_172616    | ENSMUST0000117994 | chr16 | 48994301  | 49019815  |
| 39 | 10557156 | 0.206 | Plk1           | polo-like kinase 1 (Drosophila)             | NM_011121    | ENSMUST0000033154 | chr7  | 129302952 | 129313389 |
| 40 | 10458195 | 0.206 | Cdc25c         | cell division cycle 25 homolog C (S. pombe) | NM_009860    | ENSMUST0000060710 | chr18 | 34892647  | 34911162  |
| 41 | 10476989 | 0.207 | Gins1          | GIN5 complex subunit 1 (Psf1 homolog)       | NM_027014    | NM_001163476      | chr2  | 150735337 | 150757014 |
| 42 | 10454709 | 0.209 | Kif20a         | kinesin family member 20A                   | NM_001166406 | NM_009004         | chr18 | 34784649  | 34792931  |
| 43 | 10578690 | 0.21  | Neil3          | nei like 3 (E. coli)                        | NM_146208    | ENSMUST0000047768 | chr8  | 54672221  | 54724350  |
| 44 | 10361110 | 0.21  | Dtl            | denticleless homolog (Drosophila)           | NM_029766    | ENSMUST0000027933 | chr1  | 193361244 | 193399413 |
| 45 | 10504957 | 0.212 | Smc2           | structural maintenance of chromosome s 2    | NM_008017    | ENSMUST0000102915 | chr4  | 52452121  | 52501132  |

|    |          |       |             |                                     |              |                    |       |           |           |
|----|----------|-------|-------------|-------------------------------------|--------------|--------------------|-------|-----------|-----------|
| 46 | 10520521 | 0.213 | Cenpa       | centromere protein A                | NM_007681    | ENSMUST0000031073  | chr5  | 30969275  | 30977199  |
| 47 | 10408081 | 0.213 | Hist1h1b    | histone cluster 1, H1b              | NM_020034    | ENSMUST0000080511  | chr13 | 21871752  | 21872423  |
| 48 | 10507112 | 0.216 | Stil        | Scf Tal1 interrupting locus         | NM_009185    |                    | chr4  | 114672805 | 114715801 |
| 49 | 10450374 | 0.216 | D17H6S56E-5 | DNA segment, Chr 17, human D6S56E 5 | L78788       | BC027314           | chr17 | 35133669  | 35137691  |
| 50 | 10563780 | 0.216 | E2f8        | E2F transcription factor 8          | NM_001013368 | ENSMUST00000119223 | chr7  | 56121799  | 56136966  |
| 51 | 10460738 | 0.218 | Cdca5       | cell division cycle associated 5    | NM_026410    | ENSMUST0000025704  | chr19 | 6085097   | 6091775   |
| 52 | 10571870 | 0.218 | Hmgb2       | high mobility group box 2           | NM_008252    | ENSMUST0000067925  | chr8  | 59990673  | 59993291  |
| 53 | 10474875 | 0.218 | Casc5       | cancer susceptibility candidate 5   | NM_029617    | ENSMUST0000028802  | chr2  | 118872886 | 118929847 |
| 54 | 10346365 | 0.218 | Sgol2       | shugoshin-like 2 (S. pombe)         | NM_199007    | NM_001177867       | chr1  | 58052910  | 58082741  |
| 55 | 10382998 | 0.218 | Birc5       | baculoviral IAP repeat-containing 5 | NM_001012273 | NM_009689          | chr11 | 117710551 | 117717057 |
| 56 | 10353420 | 0.218 | Mcm3        | minichromos                         | NM_008563    | ENSMUST00          | chr1  | 20793054  | 20810341  |

|    |          |       |           |                                                     |                   |                   |       |           |           |  |
|----|----------|-------|-----------|-----------------------------------------------------|-------------------|-------------------|-------|-----------|-----------|--|
|    |          |       |           | ome maintenance deficient 3 (S. cerevisiae)         |                   | 000053266         |       |           |           |  |
| 57 | 10480432 | 0.218 | Mastl     | microtubule associated serine threonine kinase-like | ENSMUST0000028119 |                   | chr2  | 22973585  | 23011436  |  |
| 58 | 10360985 | 0.219 | Cenpf     | centromere protein F                                | NM_001081363      | ENSMUST0000027900 | chr1  | 191465528 | 191511965 |  |
| 59 | 10400589 | 0.219 | C79407    | expressed sequence C79407                           | NM_172578         | BC052175          | chr12 | 66233719  | 66273585  |  |
| 60 | 10541729 | 0.221 | Cdca3     | cell division cycle associated 3                    | NM_013538         | ENSMUST0000024270 | chr6  | 124768585 | 124783716 |  |
| 61 | 10377405 | 0.221 | Aurkb     | aurora kinase B                                     | NM_011496         | ENSMUST0000021277 | chr11 | 68859145  | 68865166  |  |
| 62 | 10391811 | 0.222 | Kif18b    | kinesin family member 18B                           | NM_197959         | ENSMUST0000021311 | chr11 | 102766841 | 102786406 |  |
| 63 | 10591781 | 0.222 | Anln      | anillin, actin binding protein                      | NM_028390         | ENSMUST0000040912 | chr9  | 22136456  | 22193667  |  |
| 64 | 10474825 | 0.224 | D2Ert750e | DNA segment, Chr 2, ERATO Doi 750, expressed        | NM_026412         | ENSMUST0000028803 | chr2  | 118639739 | 118660375 |  |

|    |          |       |        |                                                                   |              |                   |       |           |           |
|----|----------|-------|--------|-------------------------------------------------------------------|--------------|-------------------|-------|-----------|-----------|
| 65 | 10510172 | 0.225 | Hmgb2  | high mobility group box 2                                         | NM_008252    | ENSMUST0000067925 | chr4  | 145632869 | 145634248 |
| 66 | 10575733 | 0.225 | Cenpn  | centromere protein N                                              | NM_028131    | ENSMUST0000034205 | chr8  | 119445640 | 119465404 |
| 67 | 10420877 | 0.225 | Esco2  | establishment of cohesion 1 homolog 2 (S. cerevisiae)             | NM_028039    | ENSMUST0000022613 | chr14 | 66437875  | 66452739  |
| 68 | 10474381 | 0.225 | Kif18a | kinesin family member 18A                                         | NM_139303    | ENSMUST0000028527 | chr2  | 109120895 | 109181906 |
| 69 | 10350392 | 0.225 | Aspm   | asp (abnormal spindle)-like, microcephaly associated (Drosophila) | NM_009791    | ENSMUST0000053364 | chr1  | 141351350 | 141390667 |
| 70 | 10462866 | 0.227 | Cep55  | centrosomal protein 55                                            | NM_001164362 | NM_028760         | chr19 | 38129530  | 38148911  |
| 71 | 10477187 | 0.228 | Tpx2   | TPX2, microtubule-associated protein homolog (Xenopus laevis)     | NM_001141977 | NM_028109         | chr2  | 152673782 | 152720790 |
| 72 | 10518350 | 0.23  | Hmgb2  | high mobility group box 2                                         | NM_008252    | BC083108          | chr4  | 146191520 | 146192064 |



|    |          |       |        |                                                          |           |                   |       |           |           |
|----|----------|-------|--------|----------------------------------------------------------|-----------|-------------------|-------|-----------|-----------|
| 73 | 10419323 | 0.232 | Dlgap5 | discs, large (Drosophila) homolog-associated protein 5   | NM_144553 | NM_001145949      | chr14 | 48007454  | 48038082  |
| 74 | 10399087 | 0.232 | Ncapg2 | non-SMC condensin II complex, subunit G2                 | NM_133762 | ENSMUST0000084828 | chr12 | 117643875 | 117702005 |
| 75 | 10518352 | 0.233 | Hmgb2  | high mobility group box 2                                | NM_008252 | ENSMUST0000067925 | chr4  | 146460527 | 146461095 |
| 76 | 10438690 | 0.237 | Rfc4   | replication factor C (activator 1) 4                     | NM_145480 | NM_013506         | chr16 | 23114006  | 23127803  |
| 77 | 10573261 | 0.238 | Asf1b  | ASF1 anti-silencing function 1 homolog B (S. cerevisiae) | NM_024184 | ENSMUST0000005607 | chr8  | 86479561  | 86494094  |
| 78 | 10534974 | 0.241 | Mcm7   | minichromosome maintenance deficient 7 (S. cerevisiae)   | NM_008568 | ENSMUST0000000505 | chr5  | 138605817 | 138613090 |
| 79 | 10406968 | 0.241 | Cenpk  | centromere protein K                                     | NM_021790 | NM_181061         | chr13 | 105018691 | 105041728 |
| 80 | 10453715 | 0.243 | Rab18  | RAB18, member RAS                                        | BC056351  | BC056351          | chr18 | 7548985   | 7549588   |

|    |          |       |                |                                                              |           |                   |       |           |           |
|----|----------|-------|----------------|--------------------------------------------------------------|-----------|-------------------|-------|-----------|-----------|
|    |          |       |                | oncogene family                                              |           |                   |       |           |           |
| 81 | 10414315 | 0.243 | Cdkn3          | cyclin-dependent kinase inhibitor 3                          | NM_028222 | ENSMUST0000067426 | chr14 | 47380232  | 47391636  |
| 82 | 10490104 | 0.245 | Aurka          | aurora kinase A                                              | NM_011497 | ENSMUST0000028997 | chr2  | 172181690 | 172196015 |
| 83 | 10594251 | 0.247 | Kif23          | kinesin family member 23                                     | NM_024245 | ENSMUST0000034815 | chr9  | 61765289  | 61794564  |
| 84 | 10369815 | 0.247 | Cdk1           | cyclin-dependent kinase 1                                    | NM_007659 | ENSMUST0000020099 | chr10 | 68799383  | 68815664  |
| 85 | 10538832 | 0.25  | Mad2l1         | MAD2 mitotic arrest deficient-like 1 (yeast)                 | NM_019499 | ENSMUST0000101343 | chr6  | 66485462  | 66491023  |
| 86 | 10420426 | 0.252 | F630043A04 Rik | RIKEN cDNA F630043A04 gene                                   | NM_198605 | ENSMUST0000022536 | chr14 | 58425398  | 58445000  |
| 87 | 10452709 | 0.252 | Ndc80          | NDC80 homolog, kinetochore complex component (S. cerevisiae) | NM_023294 | ENSMUST0000024851 | chr17 | 71845442  | 71876197  |
| 88 | 10487577 | 0.252 | Ckap2l         | cytoskeleton associated protein 2-like                       | NM_181589 | ENSMUST0000052708 | chr2  | 129094617 | 129122900 |

|    |          |       |                   |                                                                                             |                  |                        |       |           |           |
|----|----------|-------|-------------------|---------------------------------------------------------------------------------------------|------------------|------------------------|-------|-----------|-----------|
| 89 | 10565570 | 0.253 | 4632434I11R<br>ik | RIKEN cDNA<br>4632434I11<br>gene                                                            | NM_001080<br>995 | ENSMUST00<br>000032877 | chr7  | 100006035 | 100022715 |
| 90 | 10601705 | 0.253 | Cenpi             | centromere<br>protein I                                                                     | NM_145924        | BC030328               | chrX  | 130842694 | 130897178 |
| 91 | 10474769 | 0.253 | Bub1b             | budding<br>uninhibited<br>by<br>benzimidazol<br>es 1<br>homolog,<br>beta (S.<br>cerevisiae) | NM_009773        | ENSMUST00<br>000038341 | chr2  | 118423992 | 118467327 |
| 92 | 10486255 | 0.255 | Oip5              | Opa<br>interacting<br>protein 5                                                             | NM_001042<br>653 | NM_133851              | chr2  | 119435268 | 119444241 |
| 93 | 10571680 | 0.255 | Mlf1ip            | myeloid<br>leukemia<br>factor 1<br>interacting<br>protein                                   | NM_027973        | NM_001001<br>184       | chr8  | 47637409  | 47665361  |
| 94 | 10411728 | 0.255 | Cenph             | centromere<br>protein H                                                                     | NM_021886        | ENSMUST00<br>000075550 | chr13 | 101529641 | 101545854 |
| 95 | 10568150 | 0.255 | Kif22             | kinesin<br>family<br>member 22                                                              | NM_145588        | ENSMUST00<br>000106320 | chr7  | 134171245 | 134185934 |
| 96 | 10572906 | 0.257 | Mcm5              | minichromos<br>ome<br>maintenance<br>deficient 5,<br>cell division                          | NM_008566        | ENSMUST00<br>000005545 | chr8  | 77633427  | 77652338  |

|     |          |       |          |                                                           |                   |                   |       |           |           |
|-----|----------|-------|----------|-----------------------------------------------------------|-------------------|-------------------|-------|-----------|-----------|
|     |          |       |          | cycle 46 (S. cerevisiae)                                  |                   |                   |       |           |           |
| 97  | 10479811 | 0.259 | Mcm10    | minichromosome maintenance deficient 10 (S. cerevisiae)   | NM_027290         | ENSMUST0000027980 | chr2  | 4911770   | 4933837   |
| 98  | 10544106 | 0.262 | Zc3hav1  | zinc finger CCCH type, antiviral 1                        | ENSMUST0000114898 | ENSMUST0000114898 | chr6  | 38495309  | 38495809  |
| 99  | 10504470 | 0.262 | Melk     | maternal embryonic leucine zipper kinase                  | NM_010790         | ENSMUST0000045607 | chr4  | 44313789  | 44377547  |
| 100 | 10548086 | 0.264 | Rad51ap1 | RAD51 associated protein 1                                | NM_009013         | ENSMUST0000112221 | chr6  | 126873433 | 126889573 |
| 101 | 10540738 | 0.266 | Fancd2   | Fanconi anemia, complementation group D2                  | NM_001033244      | ENSMUST0000036340 | chr6  | 113481679 | 113547011 |
| 102 | 10587508 | 0.266 | Ttk      | Ttk protein kinase                                        | NM_009445         | NM_001110265      | chr9  | 83728325  | 83765993  |
| 103 | 10446074 | 0.266 | Uhrf1    | ubiquitin-like, containing PHD and RING finger domains, 1 | NM_010931         | NM_001111079      | chr17 | 56442527  | 56462909  |

|     |          |       |         |                                                           |              |                   |       |           |           |
|-----|----------|-------|---------|-----------------------------------------------------------|--------------|-------------------|-------|-----------|-----------|
| 104 | 10352767 | 0.268 | Nek2    | NIMA (never in mitosis gene a)-related expressed kinase 2 | NM_010892    | ENSMUST0000027931 | chr1  | 193645412 | 193656928 |
| 105 | 10421029 | 0.268 | Cdca2   | cell division cycle associated 2                          | NM_175384    | NM_001110162      | chr14 | 68294678  | 68333898  |
| 106 | 10594426 | 0.27  | Zwilch  | Zwilch, kinetochore associated, homolog (Drosophila)      | NM_026507    | NM_145835         | chr9  | 63984951  | 64020738  |
| 107 | 10493137 | 0.27  | Iqgap3  | IQ motif containing GTPase activating protein 3           | NM_001033484 | ENSMUST0000071812 | chr3  | 87885973  | 87924970  |
| 108 | 10568731 | 0.272 |         |                                                           | ---          |                   | chr7  | 143436704 | 143436871 |
| 109 | 10512065 | 0.274 | Gm12387 | predicted gene 12387                                      | XR_032698    |                   | chr4  | 39842229  | 39843195  |
| 110 | 10496204 | 0.275 | Cenpe   | centromere protein E                                      | NM_173762    | ENSMUST0000062893 | chr3  | 134875527 | 134936504 |
| 111 | 10528077 | 0.275 | Dbf4    | DBF4 homolog (S. cerevisiae)                              | NM_013726    | ENSMUST0000002368 | chr5  | 8396995   | 8422694   |
| 112 | 10524169 | 0.275 | Pole    | polymerase (DNA directed), epsilon                        | NM_011132    | ENSMUST0000007296 | chr5  | 110715364 | 110766474 |

|     |          |       |                |                                               |              |                   |       |           |           |
|-----|----------|-------|----------------|-----------------------------------------------|--------------|-------------------|-------|-----------|-----------|
| 113 | 10410560 | 0.275 | Trip13         | thyroid hormone receptor interactor 13        | NM_027182    | ENSMUST0000022053 | chr13 | 74049906  | 74075215  |
| 114 | 10461723 | 0.277 | Fam111a        | family with sequence similarity 111, member A | BC038020     | NM_026640         | chr19 | 12648015  | 12664188  |
| 115 | 10533090 | 0.277 | Rfc5           | replication factor C (activator 1) 5          | NM_028128    | ENSMUST0000086461 | chr5  | 117829154 | 117839042 |
| 116 | 10516246 | 0.279 | Cdca8          | cell division cycle associated 8              | NM_026560    | ENSMUST0000084296 | chr4  | 124595708 | 124614147 |
| 117 | 10352048 | 0.279 | Exo1           | exonuclease 1                                 | NM_012012    | ENSMUST0000039725 | chr1  | 177810929 | 177839424 |
| 118 | 10462973 | 0.279 | Hells          | helicase, lymphoid specific                   | NM_008234    | ENSMUST0000025965 | chr19 | 39005444  | 39042767  |
| 119 | 10577508 | 0.281 | Ckap2          | cytoskeleton associated protein 2             | NM_001004140 | ENSMUST0000046916 | chr8  | 23278921  | 23296291  |
| 120 | 10450957 | 0.281 | Cenpq          | centromere protein Q                          | NM_031863    | ENSMUST0000087114 | chr17 | 41060004  | 41071500  |
| 121 | 10440794 | 0.283 | 2610039C10 Rik | RIKEN cDNA 2610039C10 gene                    | NM_025642    | ENSMUST0000099554 | chr16 | 90714919  | 90727628  |
| 122 | 10528915 | 0.283 | Tyms           | thymidylate synthase                          | NM_021288    | NR_033402         | chr5  | 30385367  | 30400135  |

|     |          |       |        |                                                                                                  |              |                   |       |           |           |
|-----|----------|-------|--------|--------------------------------------------------------------------------------------------------|--------------|-------------------|-------|-----------|-----------|
| 123 | 10391461 | 0.283 | Brca1  | breast cancer 1                                                                                  | NM_009764    | ENSMUST0000017290 | chr11 | 101350078 | 101413179 |
| 124 | 10357436 | 0.285 | Mcm6   | minichromosome maintenance deficient 6 (MIS5 homolog, <i>S. pombe</i> ) ( <i>S. cerevisiae</i> ) | NM_008567    | ENSMUST0000027601 | chr1  | 130228167 | 130256241 |
| 125 | 10489078 | 0.287 | Dsn1   | DSN1, MIND kinetochore complex component, homolog ( <i>S. cerevisiae</i> )                       | NM_025853    | ENSMUST0000103129 | chr2  | 156821001 | 156832811 |
| 126 | 10542079 | 0.287 | Foxm1  | forkhead box M1                                                                                  | NM_008021    | BC065067          | chr6  | 128312994 | 128335006 |
| 127 | 10371770 | 0.289 | Gas2l3 | growth arrest-specific 2 like 3                                                                  | NM_001033331 | NM_001079876      | chr10 | 88874272  | 88906721  |
| 128 | 10590494 | 0.293 | Kif15  | kinesin family member 15                                                                         | NM_010620    | ENSMUST0000040717 | chr9  | 122860182 | 122927851 |
| 129 | 10428672 | 0.293 | Dscc1  | defective in sister chromatid cohesion 1 homolog ( <i>S. cerevisiae</i> )                        | NM_183089    | ENSMUST0000023059 | chr15 | 54907656  | 54922046  |

|     |          |       |        |                                                                   |           |                   |       |           |           |
|-----|----------|-------|--------|-------------------------------------------------------------------|-----------|-------------------|-------|-----------|-----------|
| 130 | 10368370 | 0.297 | Gm8681 | predicted gene 8681                                               | XR_032130 |                   | chr10 | 25552961  | 25553502  |
| 131 | 10352709 | 0.299 | Nsl1   | NSL1, MIND kinetochore complex component, homolog (S. cerevisiae) | NM_198654 | ENSMUST0000078259 | chr1  | 192886903 | 192908437 |
| 132 | 10409190 | 0.299 | Cenpp  | centromere protein P                                              | NM_025495 | ENSMUST0000021818 | chr13 | 49559396  | 49748154  |
| 133 | 10474902 | 0.299 | Rad51  | RAD51 homolog (S. cerevisiae)                                     | NM_011234 | ENSMUST0000028795 | chr2  | 118938553 | 118961809 |
| 134 | 10514466 | 0.299 | Jun    | Jun oncogene                                                      | NM_010591 | ENSMUST0000107094 | chr4  | 94715746  | 94718878  |
| 135 | 10437945 | 0.301 | Mcm4   | minichromosome maintenance deficient 4 homolog (S. cerevisiae)    | NM_008565 | ENSMUST0000023353 | chr16 | 15623994  | 15637451  |
| 136 | 10492558 | 0.301 | Smc4   | structural maintenance of chromosomes 4                           | NM_133786 | ENSMUST0000042901 | chr3  | 68808894  | 68838551  |
| 137 | 10428763 | 0.301 | Atad2  | ATPase family, AAA domain containing 2                            | NM_027435 | ENSMUST0000038194 | chr15 | 57925601  | 57966637  |



|     |          |       |                |                                               |              |                    |       |           |           |
|-----|----------|-------|----------------|-----------------------------------------------|--------------|--------------------|-------|-----------|-----------|
| 138 | 10426669 | 0.301 | Troap          | trophinin associated protein                  | NM_030159    | NM_001162506       | chr15 | 98905409  | 98913838  |
| 139 | 10356461 | 0.301 | Hjrp           | Holliday junction recognition protein         | NM_198652    | BC057309           | chr1  | 90155662  | 90174154  |
| 140 | 10432511 | 0.304 | Racgap1        | Rac GTPase-activating protein 1               | NM_012025    | ENSMUST0000023756  | chr15 | 99450722  | 99482062  |
| 141 | 10396068 | 0.306 | Ppil5          | peptidylprolyl isomerase (cyclophilin) like 5 | NM_001081406 | ENSMUST00000110621 | chr12 | 70269808  | 70279797  |
| 142 | 10379127 | 0.308 | Spag5          | sperm associated antigen 5                    | NM_017407    | ENSMUST0000045026  | chr11 | 78115099  | 78135959  |
| 143 | 10554325 | 0.308 | 5730590G19 Rik | RIKEN cDNA 5730590G19 gene                    | NM_029835    | ENSMUST0000035977  | chr7  | 86805082  | 86843246  |
| 144 | 10437040 | 0.31  | Chaf1b         | chromatin assembly factor 1, subunit B (p60)  | NM_028083    | ENSMUST0000023666  | chr16 | 93884146  | 93906360  |
| 145 | 10367076 | 0.31  | Prim1          | DNA primase, p49 subunit                      | NM_008921    | ENSMUST0000026461  | chr10 | 127452228 | 127467086 |
| 146 | 10391339 | 0.312 | Psmc3ip        | proteasome (prosome, macropain) 26S subunit,  | NM_008949    | ENSMUST0000019447  | chr11 | 100953471 | 100956717 |

|     |          |       |          |                                                                    |                  |                        |       |           |           |
|-----|----------|-------|----------|--------------------------------------------------------------------|------------------|------------------------|-------|-----------|-----------|
|     |          |       |          | ATPase 3,<br>interacting<br>protein                                |                  |                        |       |           |           |
| 147 | 10467637 | 0.314 | Arhgap19 | Rho GTPase<br>activating<br>protein 19                             | NM_027667        | NM_001163<br>495       | chr19 | 41841078  | 41876524  |
| 148 | 10405185 | 0.316 | Cks2     | CDC28<br>protein<br>kinase<br>regulatory<br>subunit 2              | NM_025415        | BC022647               | chr13 | 51740694  | 51746023  |
| 149 | 10478160 | 0.316 | Fam83d   | family with<br>sequence<br>similarity 83,<br>member D              | BC068129         | BC064129               | chr2  | 158593776 | 158612373 |
| 150 | 10426016 | 0.319 | Gtse1    | G two S<br>phase<br>expressed<br>protein 1                         | NM_013882        | NM_001168<br>672       | chr15 | 85690175  | 85707003  |
| 151 | 10521090 | 0.319 | Tacc3    | transforming<br>, acidic<br>coiled-coil<br>containing<br>protein 3 | NM_001040<br>435 | ENSMUST00<br>000074849 | chr5  | 34000777  | 34021646  |
| 152 | 10547943 | 0.319 | Ncapd2   | non-SMC<br>condensin I<br>complex,<br>subunit D2                   | NM_146171        | ENSMUST00<br>000043848 | chr6  | 125118025 | 125141613 |
| 153 | 10607747 | 0.321 | Siah1b   | seven in<br>absentia 1B                                            | NM_009173        | ENSMUST00<br>000037928 | chrX  | 160508635 | 160514072 |

|     |          |       |                |                                            |              |                   |       |           |           |
|-----|----------|-------|----------------|--------------------------------------------|--------------|-------------------|-------|-----------|-----------|
| 154 | 10427166 | 0.321 | Espl1          | extra spindle poles-like 1 (S. cerevisiae) | NM_001014976 | ENSMUST0000064924 | chr15 | 102126724 | 102154788 |
| 155 | 10494428 | 0.321 | Txnip          | thioredoxin interacting protein            | NM_001009935 | NM_023719         | chr3  | 96361880  | 96373525  |
| 156 | 10371591 | 0.321 | 4930547N16 Rik | RIKEN cDNA 4930547N16 gene                 | NM_029249    | NM_029971         | chr10 | 87554177  | 87609686  |
| 157 | 10548699 | 0.323 | Gm8956         | predicted gene 8956                        | XR_030853    |                   | chr6  | 133881605 | 133882427 |
| 158 | 10491805 | 0.325 | Plk4           | polo-like kinase 4 (Drosophila)            | NM_011495    | ENSMUST0000026858 | chr3  | 40603963  | 40620805  |
| 159 | 10544501 | 0.325 | Ezh2           | enhancer of zeste homolog 2 (Drosophila)   | NM_007971    | NM_001146689      | chr6  | 47480273  | 47545019  |
| 160 | 10353010 | 0.328 | Mybl1          | myeloblastos is oncogene-like 1            | NM_008651    | ENSMUST0000088658 | chr1  | 9658912   | 9690290   |
| 161 | 10353004 | 0.328 | Cks2           | CDC28 protein kinase regulatory subunit 2  | NM_025415    | BC094919          | chr1  | 8781724   | 8782300   |
| 162 | 10400649 | 0.33  | Pole2          | polymerase (DNA directed), epsilon 2       | NM_011133    | ENSMUST0000021359 | chr12 | 70302760  | 70329177  |

|     |          |       |           |                                                                                             |           |                   |       |          |          |
|-----|----------|-------|-----------|---------------------------------------------------------------------------------------------|-----------|-------------------|-------|----------|----------|
|     |          |       |           | (p59 subunit)                                                                               |           |                   |       |          |          |
| 163 | 10606071 | 0.332 | Ercc6l    | excision repair cross-complementing rodent repair deficiency complementation group 6 - like | NM_146235 | ENSMUST0000056904 | chrX  | 99338296 | 99352372 |
| 164 | 10506118 | 0.332 | Usp1      | ubiquitin specific peptidase 1                                                              | NM_146144 | ENSMUST0000030289 | chr4  | 98590501 | 98602229 |
| 165 | 10390050 | 0.332 | Eme1      | essential meiotic endonuclease 1 homolog 1 (S. pombe)                                       | NM_177752 | ENSMUST0000039949 | chr11 | 94506314 | 94515068 |
| 166 | 10389606 | 0.332 | Prr11     | proline rich 11                                                                             | NM_175563 | ENSMUST0000051395 | chr11 | 86902916 | 86922191 |
| 167 | 10403943 | 0.339 | Hist1h2bm | histone cluster 1, H2bm                                                                     | NM_178200 | ENSMUST0000073900 | chr13 | 21813967 | 21814347 |
| 168 | 10438378 | 0.339 | Cdc45     | cell division cycle 45 homolog (S. cerevisiae)                                              | NM_009862 | NM_001161623      | chr16 | 18780545 | 18812065 |
| 169 | 10564978 | 0.339 | Blm       | Bloom syndrome homolog (human)                                                              | NM_007550 | NM_001042527      | chr7  | 87599977 | 87679996 |

|     |          |       |        |                                                |           |                   |       |           |           |
|-----|----------|-------|--------|------------------------------------------------|-----------|-------------------|-------|-----------|-----------|
| 170 | 10472916 | 0.342 | Cdca7  | cell division cycle associated 7               | NM_025866 | ENSMUST0000102691 | chr2  | 72314265  | 72340390  |
| 171 | 10430825 | 0.344 | Cenpm  | centromere protein M                           | NM_025639 | NM_178269         | chr15 | 82064191  | 82075178  |
| 172 | 10368199 | 0.346 | Myb    | myeloblastos is oncogene                       | NM_010848 | ENSMUST0000020158 | chr10 | 20844736  | 20880790  |
| 173 | 10455813 | 0.346 | Lmnb1  | lamin B1                                       | NM_010721 | ENSMUST0000025486 | chr18 | 56867518  | 56913078  |
| 174 | 10378053 | 0.346 | Fam64a | family with sequence similarity 64, member A   | NM_144526 | ENSMUST0000021164 | chr11 | 71856004  | 71860873  |
| 175 | 10582809 | 0.349 | Tk1    | thymidine kinase 1                             | NM_009387 | ENSMUST0000026661 | chr8  | 129000148 | 129000312 |
| 176 | 10515744 | 0.349 | Cdc20  | cell division cycle 20 homolog (S. cerevisiae) | NM_023223 | ENSMUST0000006565 | chr4  | 118105506 | 118109947 |
| 177 | 10495574 | 0.349 | Sass6  | spindle assembly 6 homolog (C. elegans)        | NM_028349 | NM_030016         | chr3  | 116297926 | 116332065 |
| 178 | 10421877 | 0.351 | Diap3  | diaphanous homolog 3 (Drosophila)              | NM_019670 | ENSMUST0000022599 | chr14 | 86949278  | 87541031  |
| 179 | 10355329 | 0.351 | Bard1  | BRCA1 associated RING domain 1                 | NM_007525 | ENSMUST0000027393 | chr1  | 71076939  | 71149492  |

|     |          |       |        |                                                                |           |                        |       |           |           |
|-----|----------|-------|--------|----------------------------------------------------------------|-----------|------------------------|-------|-----------|-----------|
| 180 | 10503416 | 0.351 | Calb1  | calbindin 1                                                    | NM_009788 | ENSMUST00<br>000029876 | chr4  | 15808411  | 15835211  |
| 181 | 10425945 | 0.351 | Fbln1  | fibulin 1                                                      | NM_010180 | ENSMUST00<br>000057410 | chr15 | 85036441  | 85116724  |
| 182 | 10546163 | 0.354 | Mcm2   | minichromosome maintenance deficient 2 mitotin (S. cerevisiae) | NM_008564 | ENSMUST00<br>000058011 | chr6  | 88833468  | 88848694  |
| 183 | 10374400 | 0.354 | Fbxo48 | F-box protein 48                                               | NM_176982 | ENSMUST00<br>000061327 | chr11 | 16851413  | 16854775  |
| 184 | 10371578 | 0.356 | Ascl1  | achaete-scute complex homolog 1 (Drosophila)                   | NM_008553 | ENSMUST00<br>000020243 | chr10 | 86810957  | 86956405  |
| 185 | 10515257 | 0.356 | Rad54l | RAD54 like (S. cerevisiae)                                     | NM_009015 | NM_001122<br>958       | chr4  | 115769580 | 115796264 |
| 186 | 10588294 | 0.356 | Topbp1 | topoisomerase (DNA) II binding protein 1                       | NM_176979 | ENSMUST00<br>000035164 | chr9  | 103207545 | 103252762 |
| 187 | 10508151 | 0.356 | Clspn  | claspin homolog (Xenopus laevis)                               | NM_175554 | ENSMUST00<br>000048391 | chr4  | 126234211 | 126271147 |

|     |          |       |       |                                                       |              |                   |       |           |           |
|-----|----------|-------|-------|-------------------------------------------------------|--------------|-------------------|-------|-----------|-----------|
| 188 | 10406581 | 0.358 | Dhfr  | dihydrofolate reductase                               | NM_010049    | NM_010829         | chr13 | 93124738  | 93159008  |
| 189 | 10448506 | 0.358 | Ccnf  | cyclin F                                              | NM_007634    | ENSMUST0000073425 | chr17 | 24359494  | 24388292  |
| 190 | 10515337 | 0.358 | Nasp  | nuclear autoantigenic sperm protein (histone-binding) | NM_016777    | NM_001081475      | chr4  | 116273657 | 116300546 |
| 191 | 10352267 | 0.361 | Lin9  | lin-9 homolog (C. elegans)                            | NM_001103182 | NM_175186         | chr1  | 182571095 | 182619494 |
| 192 | 10555695 | 0.361 | Rrm1  | ribonucleotide reductase M1                           | NM_009103    | ENSMUST0000033283 | chr7  | 109590331 | 109617441 |
| 193 | 10499639 | 0.363 | Cks1b | CDC28 protein kinase 1b                               | NM_016904    | ENSMUST0000029679 | chr3  | 89219394  | 89222213  |
| 194 | 10592201 | 0.366 | Chek1 | checkpoint kinase 1 homolog (S. pombe)                | NM_007691    | ENSMUST0000034625 | chr9  | 36516067  | 36534212  |
| 195 | 10535979 | 0.366 | Rfc3  | replication factor C (activator 1) 3                  | NM_027009    | ENSMUST0000038131 | chr5  | 152445400 | 152453754 |
| 196 | 10395612 | 0.369 | G2e3  | G2 M-phase specific E3 ubiquitin                      | NM_001015099 |                   | chr12 | 52449314  | 52476555  |

|     |          |       |           |                                              |              |                   |       |           |           |
|-----|----------|-------|-----------|----------------------------------------------|--------------|-------------------|-------|-----------|-----------|
|     |          |       |           | ligase                                       |              |                   |       |           |           |
| 197 | 10404036 | 0.369 | Hist1h2bg | histone cluster 1, H2bg                      | NM_178196    | BC060304          | chr13 | 23663265  | 23663891  |
| 198 | 10363575 | 0.371 | Dna2      | DNA replication helicase 2 homolog (yeast)   | NM_177372    | ENSMUST0000092462 | chr10 | 62409792  | 62436925  |
| 199 | 10424779 | 0.371 | Cks2      | CDC28 protein kinase regulatory subunit 2    | NM_025415    | BC022647          | chr15 | 75980710  | 75981317  |
| 200 | 10393431 | 0.371 | Tk1       | thymidine kinase 1                           | NM_009387    | ENSMUST0000026661 | chr11 | 117676839 | 117687267 |
| 201 | 10450519 | 0.371 | Tcf19     | transcription factor 19                      | NM_001163763 | NM_025674         | chr17 | 35649679  | 35653699  |
| 202 | 10361995 | 0.371 | Fam54a    | family with sequence similarity 54, member A | NM_027930    | ENSMUST0000020167 | chr10 | 20067630  | 20081125  |
| 203 | 10492469 | 0.374 | Mlf1      | myeloid leukemia factor 1                    | NM_001039543 | NM_010801         | chr3  | 67178019  | 67203925  |
| 204 | 10409031 | 0.376 | Dek       | DEK oncogene (DNA binding)                   | NM_025900    | ENSMUST0000021807 | chr13 | 47180151  | 47201535  |
| 205 | 10498620 | 0.376 | Trim59    | tripartite motif-containing                  | NM_025863    | BC025430          | chr3  | 68839210  | 68848589  |



|     |          |       |           |                                                 |              |                   |       |           |           |
|-----|----------|-------|-----------|-------------------------------------------------|--------------|-------------------|-------|-----------|-----------|
|     |          |       |           | 59                                              |              |                   |       |           |           |
| 206 | 10606436 | 0.376 | Hmgn5     | high-mobility group nucleosome binding domain 5 | NM_016710    | ENSMUST0000033597 | chrX  | 106199873 | 106208698 |
| 207 | 10494407 | 0.379 | Hist2h2bb | histone cluster 2, H2bb                         | NM_175666    | BC019122          | chr3  | 96073623  | 96082947  |
| 208 | 10474437 | 0.382 | Ccdc34    | coiled-coil domain containing 34                | NM_026613    | ENSMUST0000028580 | chr2  | 109857996 | 109884805 |
| 209 | 10389134 | 0.384 | Slfn9     | schlafen 9                                      | NM_172796    | ENSMUST0000038211 | chr11 | 82793805  | 82805332  |
| 210 | 10461391 | 0.384 | Pcna      | proliferating cell nuclear antigen              | NM_011045    | ENSMUST0000028817 | chr19 | 9357740   | 9359001   |
| 211 | 10487930 | 0.384 | Pcna      | proliferating cell nuclear antigen              | NM_011045    | ENSMUST0000028817 | chr2  | 132075022 | 132078916 |
| 212 | 10389395 | 0.384 | Brip1     | BRCA1 interacting protein C-terminal helicase 1 | NM_178309    | ENSMUST0000044423 | chr11 | 85871638  | 86014695  |
| 213 | 10408225 | 0.387 | Hist1h4c  | histone cluster 1, H4c                          | NM_178208    | NM_178208         | chr13 | 23790007  | 23790321  |
| 214 | 10379363 | 0.387 | Atad5     | ATPase family, AAA                              | NM_001029856 | ENSMUST00         | chr11 | 79902914  | 79949293  |

|     |          |       |                |                                               |              |                   |       |           |           |
|-----|----------|-------|----------------|-----------------------------------------------|--------------|-------------------|-------|-----------|-----------|
|     |          |       |                | domain containing 5                           |              | 000108239         |       |           |           |
| 215 | 10406918 | 0.387 |                |                                               | ---          |                   | chr13 | 102167625 | 102234115 |
| 216 | 10359648 | 0.39  | Scyl3          | SCY1-like 3 (S. cerevisiae)                   | NM_028776    | ENSMUST0000027876 | chr1  | 165876481 | 165924912 |
| 217 | 10388234 | 0.39  | Gsg2           | germ cell-specific gene 2                     | NM_010353    | ENSMUST0000052140 | chr11 | 72948987  | 72951796  |
| 218 | 10503617 | 0.39  | F730047E07 Rik | RIKEN cDNA F730047E07 gene                    | NM_199467    | ENSMUST0000108222 | chr4  | 24424055  | 24530096  |
| 219 | 10381548 | 0.39  | BC030867       | cDNA sequence BC030867                        | NM_153544    | ENSMUST0000100392 | chr11 | 102110196 | 102126497 |
| 220 | 10550102 | 0.392 | Lig1           | ligase I, DNA, ATP-dependent                  | NM_001083188 | NM_010715         | chr7  | 13862632  | 13896775  |
| 221 | 10350297 | 0.392 | Kif14          | kinesin family member 14                      | NM_001081258 | ENSMUST0000047817 | chr1  | 138362948 | 138424190 |
| 222 | 10498371 | 0.395 | P2ry12         | purinergic receptor P2Y, G-protein coupled 12 | NM_027571    | ENSMUST0000050360 | chr3  | 59020191  | 59066747  |
| 223 | 10371888 | 0.395 | Tmpo           | thymopoietin                                  | NM_001080129 | NM_001080130      | chr10 | 90611366  | 90644223  |
| 224 | 10478355 | 0.395 | Mybl2          | myeloblastosis oncogene-                      | NM_008652    | ENSMUST0000018005 | chr2  | 162880371 | 162910423 |

|     |          |       |                   |                                                           |                  |                        |       |           |           |
|-----|----------|-------|-------------------|-----------------------------------------------------------|------------------|------------------------|-------|-----------|-----------|
|     |          |       |                   | like 2                                                    |                  |                        |       |           |           |
| 225 | 10368508 | 0.395 | 2610036L11<br>Rik | RIKEN cDNA<br>2610036L11<br>gene                          | NM_001109<br>747 | ENSMUST00<br>000099985 | chr10 | 29917006  | 29920298  |
| 226 | 10353733 | 0.398 | Prim2             | DNA<br>primase, p58<br>subunit                            | NM_008922        | ENSMUST00<br>000027312 | chr1  | 33510656  | 33726625  |
| 227 | 10401852 | 0.398 | 4930534B04<br>Rik | RIKEN cDNA<br>4930534B04<br>gene                          | NM_181815        | BC145501               | chr12 | 92236932  | 92622818  |
| 228 | 10446027 | 0.398 | Chaf1a            | chromatin<br>assembly<br>factor 1,<br>subunit A<br>(p150) | NM_013733        | ENSMUST00<br>000002914 | chr17 | 56179839  | 56207450  |
| 229 | 10546834 | 0.398 | Rad18             | RAD18<br>homolog ( <i>S.<br/>cerevisiae</i> )             | NM_001167<br>730 | NM_021385              | chr6  | 112569879 | 112646664 |
| 230 | 10492582 | 0.398 | Mir15b            | microRNA<br>15b                                           | NR_029529        |                        | chr3  | 68813678  | 68813775  |
| 231 | 10531579 | 0.398 | Hmgb1             | high<br>mobility<br>group box 1                           | NM_010439        | BC094030               | chr5  | 98504227  | 98504940  |
| 232 | 10591881 | 0.398 | Hmgb1             | high<br>mobility<br>group box 1                           | NM_010439        | L38477                 | chr9  | 25032812  | 25033359  |
| 233 | 10495316 | 0.401 | Psrc1             | proline<br>serine-rich<br>coiled-coil 1                   | NM_019976        |                        | chr3  | 108186761 | 108191149 |
| 234 | 10503264 | 0.401 | Ccne2             | cyclin E2                                                 | NM_009830        | NM_001159<br>595       | chr4  | 11118501  | 11131926  |

|     |          |       |                |                                                                              |              |                   |       |           |           |
|-----|----------|-------|----------------|------------------------------------------------------------------------------|--------------|-------------------|-------|-----------|-----------|
| 235 | 10355327 | 0.401 | Bard1          | BRCA1 associated RING domain 1                                               | NM_007525    | ENSMUST0000074184 | chr1  | 71074882  | 71075232  |
| 236 | 10495935 | 0.401 | 4930422G04 Rik | RIKEN cDNA 4930422G04 gene                                                   | NM_197997    | ENSMUST0000043108 | chr3  | 127258213 | 127284509 |
| 237 | 10508759 | 0.406 | Rpa2           | replication protein A2                                                       | NM_011284    | ENSMUST0000102561 | chr4  | 132324275 | 132334661 |
| 238 | 10576140 | 0.406 | Cdt1           | chromatin licensing and DNA replication factor 1                             | NM_026014    | ENSMUST0000006760 | chr8  | 125091915 | 125097454 |
| 239 | 10490815 | 0.406 | Gm5841         | predicted gene 5841                                                          | XR_031642    |                   | chr3  | 8327501   | 8329899   |
| 240 | 10372503 | 0.409 | Lgr5           | leucine rich repeat containing G protein coupled receptor 5                  | NM_010195    | ENSMUST0000020350 | chr10 | 114887370 | 115024836 |
| 241 | 10411782 | 0.409 | Pik3r1         | phosphatidylinositol 3-kinase, regulatory subunit, polypeptide 1 (p85 alpha) | NM_001077495 | NM_001024955      | chr13 | 102450716 | 102538172 |
| 242 | 10408077 | 0.409 | Hist1h2ak      | histone cluster 1,                                                           | NM_178183    | ENSMUST00         | chr13 | 21845264  | 21845781  |

|     |          |       |                   |                                                       |           |                        |       |           |           |
|-----|----------|-------|-------------------|-------------------------------------------------------|-----------|------------------------|-------|-----------|-----------|
|     |          |       |                   | H2ak                                                  |           | 000074752              |       |           |           |
| 243 | 10498053 | 0.412 | 4930583H14<br>Rik | RIKEN cDNA<br>4930583H14<br>gene                      | NR_028121 | NM_026358              | chr3  | 51192334  | 51200462  |
| 244 | 10402073 | 0.412 | 2610021K21<br>Rik | RIKEN cDNA<br>2610021K21<br>gene                      | NM_030172 | BC049109               | chr12 | 100955741 | 101121652 |
| 245 | 10449999 | 0.412 | Zfp101            | zinc finger<br>protein 101                            | NM_009542 | ENSMUST00<br>000038834 | chr17 | 33517637  | 33531544  |
| 246 | 10465861 | 0.415 | Incenp            | inner<br>centromere<br>protein                        | NM_016692 | ENSMUST00<br>000025562 | chr19 | 9946836   | 9973959   |
| 247 | 10514201 | 0.415 | Haus6             | HAUS<br>augmin-like<br>complex,<br>subunit 6          | NM_173400 | ENSMUST00<br>000070607 | chr4  | 86227188  | 86257926  |
| 248 | 10465912 | 0.415 | Fen1              | flap<br>structure<br>specific<br>endonucleas<br>e 1   | NM_007999 | ENSMUST00<br>000025651 | chr19 | 10273628  | 10278433  |
| 249 | 10500543 | 0.418 | Hmgb1             | high<br>mobility<br>group box 1                       | NM_010439 | BC094030               | chr3  | 98383774  | 98384321  |
| 250 | 10355325 | 0.418 | Bard1             | BRCA1<br>associated<br>RING domain<br>1               | NM_007525 | ENSMUST00<br>000097702 | chr1  | 71074294  | 71074611  |
| 251 | 10349637 | 0.418 | Fam72a            | family with<br>sequence<br>similarity 72,<br>member A | BC138225  | NM_175382              | chr1  | 133424480 | 133436449 |

|     |          |       |         |                                                                     |              |                   |       |           |           |
|-----|----------|-------|---------|---------------------------------------------------------------------|--------------|-------------------|-------|-----------|-----------|
| 252 | 10480087 | 0.418 | Gm13310 | karyopherin (importin) alpha 2 pseudogene                           | XR_032234    |                   | chr2  | 12004239  | 12005630  |
| 253 | 10591556 | 0.418 | Spc24   | SPC24, NDC80 kinetochore complex component, homolog (S. cerevisiae) | NM_026282    | ENSMUST0000098942 | chr9  | 21559886  | 21564733  |
| 254 | 10376459 | 0.42  | Gm12260 | histone cluster 1, H3 pseudogene                                    | XM_905850    |                   | chr11 | 58775324  | 58775714  |
| 255 | 10582835 | 0.42  | Hmgb1   | high mobility group box 1                                           | NM_010439    | L38477            | chr8  | 129505597 | 129506132 |
| 256 | 10489127 | 0.42  | Rbl1    | retinoblastoma-like 1 (p107)                                        | NM_011249    | NM_001139516      | chr2  | 156971629 | 157030255 |
| 257 | 10385325 | 0.42  | Pttg1   | pituitary tumor-transforming gene 1                                 | NM_013917    | NM_001131054      | chr11 | 43233764  | 43239753  |
| 258 | 10363743 | 0.42  | Rtkn2   | rhotekin 2                                                          | NM_001081346 | ENSMUST0000105437 | chr10 | 67442353  | 67521903  |
| 259 | 10373530 | 0.423 | Cdk2    | cyclin-dependent kinase 2                                           | NM_183417    | NM_016756         | chr10 | 128134995 | 128142068 |
| 260 | 10600545 | 0.423 | Hmgb1   | high mobility                                                       | NM_010439    | BC094030          | chrX  | 74701925  | 74745544  |

|     |          |       |                |                                                          |              |                   |       |           |           |
|-----|----------|-------|----------------|----------------------------------------------------------|--------------|-------------------|-------|-----------|-----------|
|     |          |       |                | group box 1                                              |              |                   |       |           |           |
| 261 | 10372687 | 0.423 | Nup107         | nucleoporin 107                                          | NM_134010    | ENSMUST0000064848 | chr10 | 117187677 | 117229761 |
| 262 | 10573451 | 0.423 | Syce2          | synaptonemal complex central element protein 2           | NM_001168246 | NM_027954         | chr8  | 87396010  | 87411295  |
| 263 | 10472235 | 0.423 | Dapl1          | death associated protein-like 1                          | NM_029723    | ENSMUST0000028369 | chr2  | 59322714  | 59342940  |
| 264 | 10497483 | 0.426 | Hmgb1          | high mobility group box 1                                | NM_010439    | BC110667          | chr3  | 21979325  | 21979965  |
| 265 | 10476362 | 0.426 | Mcm8           | minichromosome maintenance deficient 8 (S. cerevisiae)   | NM_025676    | ENSMUST0000066559 | chr2  | 132641930 | 132670005 |
| 266 | 10416736 | 0.426 | 6720463M24 Rik | RIKEN cDNA 6720463M24 gene                               | NM_175265    | ENSMUST0000022656 | chr14 | 99445596  | 99473759  |
| 267 | 10501402 | 0.426 | Gpsm2          | G-protein signalling modulator 2 (AGS3-like, C. elegans) | NM_029522    | ENSMUST0000029482 | chr3  | 108481556 | 108525061 |
| 268 | 10566142 | 0.429 | Hmgb1          | high mobility                                            | NM_010439    | BC094030          | chr7  | 109668978 | 109669553 |

|     |          |       |         |                                                      |              |                   |       |           |           |
|-----|----------|-------|---------|------------------------------------------------------|--------------|-------------------|-------|-----------|-----------|
|     |          |       |         | group box 1                                          |              |                   |       |           |           |
| 269 | 10475362 | 0.429 | Wdr76   | WD repeat domain 76                                  | NM_030234    | ENSMUST0000110602 | chr2  | 121332506 | 121370596 |
| 270 | 10478572 | 0.429 | Ube2c   | ubiquitin-conjugating enzyme E2C                     | NM_026785    | NM_009394         | chr2  | 164595429 | 164604320 |
| 271 | 10403945 | 0.429 | Gm11275 | predicted gene 11275                                 | BC139425     | NM_178210         | chr13 | 21826931  | 21827706  |
| 272 | 10499366 | 0.429 | Pmf1    | polyamine-modulated factor 1                         | NM_025928    | ENSMUST0000056370 | chr3  | 88198060  | 88214256  |
| 273 | 10479765 | 0.429 | Suv39h2 | suppressor of variegation 3-9 homolog 2 (Drosophila) | NM_022724    | NR_027509         | chr2  | 3373092   | 3392236   |
| 274 | 10416655 | 0.432 | Gm5465  | predicted gene 5465                                  | NM_001034882 | ENSMUST0000100359 | chr14 | 79851642  | 79854623  |
| 275 | 10496975 | 0.432 | Slc44a5 | solute carrier family 44, member 5                   | NM_001081263 | ENSMUST0000089948 | chr3  | 153636400 | 153934686 |
| 276 | 10572130 | 0.432 | Lpl     | lipoprotein lipase                                   | NM_008509    | ENSMUST0000015712 | chr8  | 71404453  | 71431347  |
| 277 | 10488785 | 0.432 | E2f1    | E2F transcription factor 1                           | NM_007891    | ENSMUST0000103145 | chr2  | 154385374 | 154395588 |
| 278 | 10384145 | 0.435 | H2afv   | H2A histone family,                                  | NM_029938    | ENSMUST00         | chr11 | 6328141   | 6339462   |



|     |          |       |                |                                                     |              |                   |       |           |           |
|-----|----------|-------|----------------|-----------------------------------------------------|--------------|-------------------|-------|-----------|-----------|
|     |          |       |                | member V                                            |              | 000060240         |       |           |           |
| 279 | 10472782 | 0.435 | Hat1           | histone aminotransferase 1                          | NM_026115    | ENSMUST0000112122 | chr2  | 71227314  | 71279679  |
| 280 | 10372139 | 0.435 | Nts            | neurotensin                                         | NM_024435    | ENSMUST0000020040 | chr10 | 101944390 | 101953069 |
| 281 | 10392413 | 0.435 |                |                                                     | ---          |                   | chr11 | 108928298 | 108928404 |
| 282 | 10403834 | 0.438 | Sfrp4          | secreted frizzled-related protein 4                 | NM_016687    | ENSMUST0000002883 | chr13 | 19715041  | 19790804  |
| 283 | 10477986 | 0.438 | Nnat           | neuronatin                                          | NM_010923    | NM_180960         | chr2  | 157385846 | 157388253 |
| 284 | 10354275 | 0.438 | 1700029F09 Rik | RIKEN cDNA 1700029F09 gene                          | BC119032     | NM_029368         | chr1  | 44143655  | 44159268  |
| 285 | 10408200 | 0.438 | Hist1h4f       | histone cluster 1, H4f                              | NM_175655    |                   | chr13 | 23643201  | 23643515  |
| 286 | 10381072 | 0.438 | Cdc6           | cell division cycle 6 homolog (S. cerevisiae)       | NM_011799    | NM_001025779      | chr11 | 98769203  | 98785256  |
| 287 | 10499035 | 0.441 | Mnd1           | meiotic nuclear divisions 1 homolog (S. cerevisiae) | NM_029797    | NR_030680         | chr3  | 83891855  | 83959635  |
| 288 | 10381526 | 0.441 | Ppih           | peptidyl prolyl isomerase H                         | NM_001110130 | NM_028677         | chr11 | 101985388 | 101985954 |
| 289 | 10366983 | 0.441 | Tmem194        |                                                     | NM_001113    | NM_173732         | chr10 | 127114120 | 127138103 |

|     |          |       |                |                                         |              |                   |       |           |           |
|-----|----------|-------|----------------|-----------------------------------------|--------------|-------------------|-------|-----------|-----------|
|     |          |       |                | transmembrane protein 194               | 211          |                   |       |           |           |
| 290 | 10605674 | 0.441 | Pola1          | polymerase (DNA directed), alpha 1      | NM_008892    | ENSMUST0000006856 | chrX  | 90550106  | 90877494  |
| 291 | 10447702 | 0.441 | Ppih           | peptidyl prolyl isomerase H             | NM_028677    | NM_001110129      | chr17 | 9614805   | 9615317   |
| 292 | 10509168 | 0.441 | E2f2           | E2F transcription factor 2              | NM_177733    | ENSMUST0000061721 | chr4  | 135728309 | 135750643 |
| 293 | 10498386 | 0.444 | Igsf10         | immunoglobulin superfamily, member 10   | NM_001162884 | ENSMUST0000097075 | chr3  | 59133093  | 59145254  |
| 294 | 10515884 | 0.444 | Ppih           | peptidyl prolyl isomerase H             | NM_028677    | NM_001110129      | chr4  | 118972616 | 118993106 |
| 295 | 10554281 | 0.444 | Fanci          | Fanconi anemia, complementation group I | NM_145946    | NM_017462         | chr7  | 86537224  | 86595150  |
| 296 | 10495945 | 0.444 | 4930422G04 Rik | RIKEN cDNA 4930422G04 gene              | NM_197997    | ENSMUST0000043108 | chr3  | 127286502 | 127320934 |
| 297 | 10586184 | 0.444 | Tipin          | timeless interacting protein            | NM_025372    | ENSMUST0000034964 | chr9  | 64129414  | 64152601  |
| 298 | 10571696 | 0.444 | Casp3          | caspase 3                               | NM_009810    | ENSMUST00         | chr8  | 47702772  | 47724071  |

|     |          |       |        |                                              |                   |                   |       |           |           |
|-----|----------|-------|--------|----------------------------------------------|-------------------|-------------------|-------|-----------|-----------|
|     |          |       |        |                                              |                   | 000093517         |       |           |           |
| 299 | 10548600 | 0.444 | Hmgb1l | high mobility group box 1-like               | ENSMUST0000082150 |                   | chr6  | 131558311 | 131558910 |
| 300 | 10475610 | 0.444 | Dut    | deoxyuridine triphosphatase                  | NM_023595         | NM_001159646      | chr2  | 125072994 | 125084785 |
| 301 | 10419296 | 0.448 | Wdhd1  | WD repeat and HMG-box DNA binding protein 1  | NM_172598         | ENSMUST0000111792 | chr14 | 47860619  | 47896488  |
| 302 | 10444911 | 0.448 | Mdc1   | mediator of DNA damage checkpoint 1          | NM_001010833      | ENSMUST0000082337 | chr17 | 35981380  | 35996614  |
| 303 | 10570470 | 0.448 | Hmgb1  | high mobility group box 1                    | NM_010439         | BC110667          | chr8  | 14136310  | 14138876  |
| 304 | 10436442 | 0.448 | Fam60a | family with sequence similarity 60, member A | NM_019643         | ENSMUST0000054080 | chr16 | 61377083  | 61379570  |
| 305 | 10437432 | 0.448 | Nmral1 | NmrA-like family domain containing 1         | NM_026393         | ENSMUST0000115851 | chr16 | 4711317   | 4719112   |
| 306 | 10353341 | 0.448 | Hmgb1  | high mobility group box 1                    | NM_010439         | L38477            | chr1  | 19143391  | 19144047  |
| 307 | 10379989 | 0.448 | Fam33a | family with sequence similarity 33,          | NM_025377         | ENSMUST0000020794 | chr11 | 86922733  | 86938136  |

|     |          |       |       |                                           |              |                   |       |           |           |
|-----|----------|-------|-------|-------------------------------------------|--------------|-------------------|-------|-----------|-----------|
|     |          |       |       | member A                                  |              |                   |       |           |           |
| 308 | 10562084 | 0.448 | Haus5 | HAUS augmin-like complex, subunit 5       | NM_027999    | ENSMUST0000019697 | chr7  | 31438733  | 31449992  |
| 309 | 10453252 | 0.448 | Hmgb1 | high mobility group box 1                 | NM_010439    | L38477            | chr17 | 82591215  | 82591949  |
| 310 | 10538338 | 0.448 | Creb5 | cAMP responsive element binding protein 5 | NM_172728    | ENSMUST0000047450 | chr6  | 53237315  | 53646012  |
| 311 | 10561868 | 0.451 | Wdr62 | WD repeat domain 62                       | NM_146186    | ENSMUST0000047189 | chr7  | 31025157  | 31065415  |
| 312 | 10453867 | 0.451 | Rbbp8 | retinoblastoma binding protein 8          | NM_001081223 | ENSMUST0000115861 | chr18 | 11791785  | 11901330  |
| 313 | 10429455 | 0.451 | Hmgb1 | high mobility group box 1                 | NM_010439    | BC083067          | chr15 | 73923563  | 73924894  |
| 314 | 10366277 | 0.451 | E2f7  | E2F transcription factor 7                | NM_178609    | ENSMUST0000073781 | chr10 | 110182521 | 110224440 |
| 315 | 10465282 | 0.451 | Pola2 | polymerase (DNA directed), alpha 2        | NM_008893    | NM_001164057      | chr19 | 5940546   | 5964197   |
| 316 | 10385426 | 0.451 | Hmgb1 | high mobility group box 1                 | NM_010439    | BC111468          | chr11 | 46056037  | 46057694  |

|     |          |       |                   |                                                            |           |                   |       |           |           |
|-----|----------|-------|-------------------|------------------------------------------------------------|-----------|-------------------|-------|-----------|-----------|
| 317 | 10462361 | 0.451 | Hmgb1             | high mobility group box 1                                  | NM_010439 | L38477            | chr19 | 29234608  | 29235255  |
| 318 | 10565589 | 0.454 | Hmgb1             | high mobility group box 1                                  | NM_010439 | BC110667          | chr7  | 103351511 | 103352046 |
| 319 | 10386949 | 0.454 | Hmgb1             | high mobility group box 1                                  | NM_010439 | L38477            | chr11 | 63659787  | 63660320  |
| 320 | 10549497 | 0.454 | Fam60a            | family with sequence similarity 60, member A               | NM_019643 | ENSMUST0000054080 | chr6  | 148869579 | 148894954 |
| 321 | 10573615 | 0.457 | Orc6l             | origin recognition complex, subunit 6-like (S. cerevisiae) | NM_019716 | NM_001163791      | chr8  | 87823690  | 87831970  |
| 322 | 10350590 | 0.457 | Ska2l             | spindle and kinetochore associated complex subunit 2-like  | XM_890112 |                   | chr1  | 152396447 | 152396809 |
| 323 | 10453512 | 0.457 | Kpna2             | karyopherin (importin) alpha 2                             | NM_010655 | D55720            | chr17 | 90307792  | 90309769  |
| 324 | 10461930 | 0.457 | D030056L22<br>Rik | RIKEN cDNA D030056L22 gene                                 | BC020125  | NM_177640         | chr19 | 18787726  | 18792919  |
| 325 | 10592154 | 0.457 | Hyls1             | hydrolethalu                                               | NM_029762 | ENSMUST00         | chr9  | 35368405  | 35377630  |

|     |          |       |           |                                                                  |              |                   |       |           |           |
|-----|----------|-------|-----------|------------------------------------------------------------------|--------------|-------------------|-------|-----------|-----------|
|     |          |       |           | s syndrome 1                                                     |              | 000115110         |       |           |           |
| 326 | 10569994 | 0.46  | Hmgb1     | high mobility group box 1                                        | NM_010439    | BC110667          | chr8  | 4713207   | 4713716   |
| 327 | 10521690 | 0.46  | Ppih      | peptidyl prolyl isomerase H                                      | NM_028677    | NM_001110129      | chr5  | 44304409  | 44305156  |
| 328 | 10498379 | 0.463 | Igsf10    | immunoglobulin superfamily, member 10                            | NM_001162884 |                   | chr3  | 59121847  | 59132793  |
| 329 | 10494322 | 0.463 | Anp32e    | acidic (leucine-rich) nuclear phosphoprotein 32 family, member E | NM_023210    | ENSMUST0000015893 | chr3  | 95733214  | 95750899  |
| 330 | 10402750 | 0.463 | Hmgb1     | high mobility group box 1                                        | NM_010439    | L38477            | chr12 | 113168702 | 113169248 |
| 331 | 10351047 | 0.467 | Cenpl     | centromere protein L                                             | NM_027429    | NM_001159930      | chr1  | 163001072 | 163016457 |
| 332 | 10546088 | 0.467 | H1fx      | H1 histone family, member X                                      | NM_198622    | ENSMUST0000056403 | chr6  | 87930415  | 87931476  |
| 333 | 10376444 | 0.467 | Hist3h2ba | histone cluster 3, H2ba                                          | NM_030082    | ENSMUST0000078267 | chr11 | 58762413  | 58763035  |
| 334 | 10355403 | 0.467 | Fn1       | fibronectin 1                                                    | NM_010233    | ENSMUST0000055226 | chr1  | 71632097  | 71699746  |

|     |          |       |           |                                                               |              |                   |       |           |           |
|-----|----------|-------|-----------|---------------------------------------------------------------|--------------|-------------------|-------|-----------|-----------|
| 335 | 10552337 | 0.467 | Hmg1l1    | high-mobility group (nonhistone chromosomal) protein 1-like 1 | NM_001111282 | NM_010439         | chr7  | 49276117  | 49277373  |
| 336 | 10498383 | 0.467 | IgSF10    | immunoglobulin superfamily, member 10                         | NM_001162884 | ENSMUST0000097075 | chr3  | 59131706  | 59135965  |
| 337 | 10360324 | 0.467 | Gm2710    | predicted gene 2710                                           | XR_030924    |                   | chr1  | 174594102 | 174599908 |
| 338 | 10567412 | 0.47  | Eri2      | exoribonuclease 2                                             | NM_027698    | NM_016870         | chr7  | 126915841 | 126937474 |
| 339 | 10408266 | 0.47  | Hist1h2ba | histone cluster 1, H2ba                                       | NM_175663    | ENSMUST0000052776 | chr13 | 24025641  | 24026025  |
| 340 | 10590648 | 0.47  | Top2a     | topoisomerase (DNA) II alpha                                  | NM_011623    | ENSMUST0000068031 | chr9  | 3496414   | 3497471   |
| 341 | 10502029 | 0.47  | Larp7     | Larbinucleoprotein domain family, member 7                    | NM_138593    | ENSMUST0000029588 | chr3  | 127239632 | 127256267 |
| 342 | 10376950 | 0.47  | Pmp22     | peripheral myelin protein 22                                  | NM_008885    | ENSMUST0000018361 | chr11 | 62945012  | 62973049  |

|     |          |       |           |                                          |              |                   |       |           |           |
|-----|----------|-------|-----------|------------------------------------------|--------------|-------------------|-------|-----------|-----------|
| 343 | 10403948 | 0.47  | Hist1h2be | histone cluster 1, H2be                  | NM_001177653 | NM_178194         | chr13 | 21845983  | 21846421  |
| 344 | 10518526 | 0.473 | Angptl7   | angiopoietin-like 7                      | NM_001039554 | ENSMUST0000030840 | chr4  | 147869292 | 147874571 |
| 345 | 10404024 | 0.473 | Hist1h4h  | histone cluster 1, H4h                   | NM_153173    | BC087952          | chr13 | 23622919  | 23623388  |
| 346 | 10446441 | 0.473 | Ddx11     | DEAD H (Asp-Glu-Ala-Asp)                 | NM_001003919 |                   | chr17 | 66472860  | 66501508  |
| 347 | 10583952 | 0.476 | Ncapd3    | non-SMC condensin II complex, subunit D3 | NM_178113    | ENSMUST0000073127 | chr9  | 26837760  | 26902900  |
| 348 | 10556297 | 0.476 | Adm       | adrenomedullin                           | NM_009627    | ENSMUST0000033054 | chr7  | 117771175 | 117773334 |
| 349 | 10467420 | 0.476 | Pdlim1    | PDZ and LIM domain 1 (elfin)             | NM_016861    | ENSMUST0000068439 | chr19 | 40295663  | 40346023  |
| 350 | 10408210 | 0.476 | Hist1h2bc | histone cluster 1, H2bc                  | NM_023422    | NM_001110555      | chr13 | 23665679  | 23666059  |
| 351 | 10408113 | 0.476 | Hist1h4i  | histone cluster 1, H4i                   | NM_175656    | BC092144          | chr13 | 22132505  | 22133221  |
| 352 | 10596958 | 0.476 |           |                                          | ---          |                   | chr9  | 108641084 | 108641189 |
| 353 | 10360745 | 0.48  | Lbr       | lamin B receptor                         | NM_133815    | ENSMUST0000005003 | chr1  | 183745447 | 183772492 |



|     |          |       |         |                                                                        |           |                   |       |           |           |
|-----|----------|-------|---------|------------------------------------------------------------------------|-----------|-------------------|-------|-----------|-----------|
| 354 | 10587778 | 0.48  |         |                                                                        | ---       |                   | chr9  | 90246833  | 90247009  |
| 355 | 10362581 | 0.48  | Tube1   | epsilon-tubulin 1                                                      | NM_028006 | ENSMUST0000019991 | chr10 | 38853829  | 38870864  |
| 356 | 10528790 | 0.48  | Xrcc2   | X-ray repair complementing defective repair in Chinese hamster cells 2 | NM_020570 | ENSMUST0000030773 | chr5  | 25195630  | 25211615  |
| 357 | 10508721 | 0.48  | Snora44 | small nucleolar RNA, HACA box 44                                       | AF357394  |                   | chr4  | 131865856 | 131865984 |
| 358 | 10435581 | 0.48  | Polq    | polymerase (DNA directed), theta                                       | NM_029977 | NM_001159369      | chr16 | 37010793  | 37095483  |
| 359 | 10497503 | 0.48  | Kpna2   | karyopherin (importin) alpha 2                                         | NM_010655 | D55720            | chr3  | 25109938  | 25111527  |
| 360 | 10497325 | 0.483 | Hmgb1   | high mobility group box 1                                              | NM_010439 | L38477            | chr3  | 13669613  | 13670145  |
| 361 | 10431915 | 0.483 | Slc38a4 | solute carrier family 38, member 4                                     | NM_027052 | ENSMUST0000023101 | chr15 | 96825254  | 96886387  |
| 362 | 10571214 | 0.483 | Rnf122  | ring finger protein 122                                                | NM_175136 | ENSMUST0000046941 | chr8  | 32222318  | 32242227  |

|     |          |       |                   |                                                                 |                  |                        |       |           |           |
|-----|----------|-------|-------------------|-----------------------------------------------------------------|------------------|------------------------|-------|-----------|-----------|
| 363 | 10492679 | 0.483 | 4930579G24<br>Rik | RIKEN cDNA<br>4930579G24<br>gene                                | NM_029482        | ENSMUST00<br>000029388 | chr3  | 79433020  | 79436742  |
| 364 | 10392284 | 0.486 | Kpna2             | karyopherin<br>(importin)<br>alpha 2                            | NM_010655        | D55720                 | chr11 | 106849943 | 106860839 |
| 365 | 10408212 | 0.486 | Hist1h2be         | histone<br>cluster 1,<br>H2be                                   | NM_001177<br>653 | NM_178194              | chr13 | 23675610  | 23714427  |
| 366 | 10591773 | 0.486 | Hmgn2             | high<br>mobility<br>group<br>nucleosomal<br>binding<br>domain 2 | NM_016957        | BC090836               | chr9  | 22124391  | 22125902  |
| 367 | 10455439 | 0.486 | Hmgb1             | high<br>mobility<br>group box 1                                 | NM_010439        | BC094030               | chr18 | 44221252  | 44221789  |
| 368 | 10507653 | 0.486 |                   |                                                                 | ---              |                        | chr4  | 119193595 | 119193971 |
| 369 | 10548735 | 0.486 | Dusp16            | dual<br>specificity<br>phosphatase<br>16                        | NM_130447        | NM_001048<br>054       | chr6  | 134665486 | 134742646 |
| 370 | 10383731 | 0.486 | Smtn              | smoothelin                                                      | NM_001159<br>284 | NM_013870              | chr11 | 3417526   | 3439295   |
| 371 | 10401948 | 0.486 |                   |                                                                 | ---              |                        | chr12 | 96617055  | 96617161  |
| 372 | 10408687 | 0.486 | Hmgb1             | high<br>mobility<br>group box 1                                 | NM_010439        | BC094030               | chr13 | 36650420  | 36650934  |
| 373 | 10403978 | 0.486 | Gm11277           | predicted<br>gene 11277                                         | NM_001110<br>555 | NM_001097              | chr13 | 22127756  | 22128136  |

|     |          |       |           |                                                                 |           |                        |       |           |           |
|-----|----------|-------|-----------|-----------------------------------------------------------------|-----------|------------------------|-------|-----------|-----------|
|     |          |       |           |                                                                 |           | 979                    |       |           |           |
| 374 | 10606619 | 0.49  | Sytl4     | synaptotagm<br>in-like 4                                        | NM_013757 | ENSMUST00<br>000033608 | chrX  | 130470922 | 130516351 |
| 375 | 10582501 | 0.49  | Fanca     | Fanconi<br>anemia,<br>complement<br>ation group<br>A            | NM_016925 | ENSMUST00<br>000035495 | chr8  | 125792200 | 125842476 |
| 376 | 10517141 | 0.49  | Hmgn2     | high<br>mobility<br>group<br>nucleosomal<br>binding<br>domain 2 | NM_016957 | BC090836               | chr4  | 133520654 | 133523906 |
| 377 | 10408085 | 0.493 | Hist1h2an | histone<br>cluster 1,<br>H2an                                   | NM_178184 | NM_001177<br>544       | chr13 | 21878695  | 21879087  |
| 378 | 10371307 | 0.493 | Nfyb      | nuclear<br>transcription<br>factor-Y beta                       | NM_010914 | ENSMUST00<br>000105309 | chr10 | 82211445  | 82226886  |
| 379 | 10579659 | 0.493 | Hmgn2     | high<br>mobility<br>group<br>nucleosomal<br>binding<br>domain 2 | NM_016957 | BC090836               | chr8  | 74827954  | 74829162  |
| 380 | 10591369 | 0.493 | Dnmt1     | DNA<br>methyltransf<br>erase<br>(cytosine-5)<br>1               | NM_010066 | ENSMUST00<br>000004202 | chr9  | 20711653  | 20764332  |

|     |          |       |                |                                           |              |                   |       |           |           |
|-----|----------|-------|----------------|-------------------------------------------|--------------|-------------------|-------|-----------|-----------|
| 381 | 10451547 | 0.493 | Gm16494        | predicted gene 16494                      | XM_001480078 |                   | chr17 | 47153645  | 47153905  |
| 382 | 10438091 | 0.493 | 2610318N02 Rik | RIKEN cDNA 2610318N02 gene                | BC039993     | ENSMUST0000093336 | chr16 | 17113491  | 17125199  |
| 383 | 10444927 | 0.493 | Nrm            | nurim (nuclear envelope membrane protein) | NM_134122    | ENSMUST0000074259 | chr17 | 35998263  | 36002347  |
| 384 | 10407081 | 0.493 | Depdc1b        | DEP domain containing 1B                  | NM_178683    | ENSMUST0000051594 | chr13 | 109106531 | 109197976 |
| 385 | 10542038 | 0.497 | Hmgb1          | high mobility group box 1                 | NM_010439    | BC094030          | chr6  | 127361146 | 127418425 |
| 386 | 10604735 | 0.497 | Rbmx           | RNA binding motif protein, X chromosome   | NM_011252    | NM_001166623      | chrX  | 54639535  | 54646199  |
| 387 | 10574378 | 0.497 | Gins3          | GIN5 complex subunit 3 (Psf3 homolog)     | NM_030198    | ENSMUST0000034094 | chr8  | 98157459  | 98168959  |
| 388 | 10410092 | 0.497 | Zfp367         | zinc finger protein 367                   | NM_175494    | ENSMUST0000059817 | chr13 | 64234365  | 64254507  |
| 389 | 10399254 | 0.497 | Cenpo          | centromere protein O                      | NM_134046    | NM_138305         | chr12 | 4211672   | 4234294   |
| 390 | 10424413 | 0.497 | Hmgb1          | high mobility group box 1                 | NM_010439    | BC111468          | chr15 | 63463246  | 63463909  |

|     |          |       |                   |                                   |                  |                        |       |           |           |
|-----|----------|-------|-------------------|-----------------------------------|------------------|------------------------|-------|-----------|-----------|
| 391 | 10508996 | 0.497 | 2610002D18<br>Rik | RIKEN cDNA<br>2610002D18<br>gene  | BC138271         | NM_001081<br>099       | chr4  | 134067017 | 134079679 |
| 392 | 10531707 | 0.497 | Lin54             | lin-54<br>homolog (C.<br>elegans) | NM_001115<br>010 | NM_172714              | chr5  | 100871060 | 100929658 |
| 393 | 10553857 | 0.497 | Hmgb1             | high<br>mobility<br>group box 1   | NM_010439        | L38477                 | chr7  | 70750905  | 70751437  |
| 394 | 10408197 | 0.497 | Hist1h2bh         | histone<br>cluster 1,<br>H2bh     | NM_178197        | ENSMUST00<br>000078156 | chr13 | 23634791  | 23635228  |

Supplemental table 1: Genes that are downregulated (<0.5 fold ratio) by Sunitinib treatment of MPC 4/30 cells.
