# Supplementary material
Source: PubMed Central journal article supplement (PMC4977182)
Supplement: NIHMS4061-supplement-2.pdf [file NIHMS4061-supplement-2.pdf]

| <b>N<br/>o</b> | <b>probes<br/>et_id</b> | <b>rati<br/>o</b> | <b>Gene</b> | <b>Gene full name</b>                                    | <b>gene_ assig<br/>nment</b> | <b>ENSEMBL ID</b>      | <b>seqn<br/>ame</b> | <b>start</b>  | <b>stop</b>   |
|----------------|-------------------------|-------------------|-------------|----------------------------------------------------------|------------------------------|------------------------|---------------------|---------------|---------------|
| 1              | 104816<br>27            | 7.4<br>64         | Lcn2        | lipocalin 2                                              | NM_00849<br>1                | ENSMUST0000<br>0050785 | chr2                | 32240<br>156  | 32243<br>259  |
| 2              | 103667<br>74            | 5.0<br>98         | Avil        | advillin                                                 | NM_00963<br>5                | ENSMUST0000<br>0026500 | chr10               | 12643<br>7795 | 12645<br>8044 |
| 3              | 103889<br>54            | 4.3<br>47         | Omg         | oligodendrocyte myelin glycoprotein                      | NM_01940<br>9                | ENSMUST0000<br>0108247 | chr11               | 79314<br>840  | 79317<br>521  |
| 4              | 105728<br>97            | 4.2<br>87         | Hmox<br>1   | heme oxygenase (decycling) 1                             | NM_01044<br>2                | ENSMUST0000<br>0005548 | chr8                | 77617<br>521  | 77624<br>489  |
| 5              | 103505<br>16            | 4.1<br>99         | Ptgs2       | prostaglandin-endoperoxide synthase 2                    | NM_01119<br>8                | ENSMUST0000<br>0035065 | chr1                | 15194<br>7230 | 15195<br>5147 |
| 6              | 105666<br>32            | 3.3<br>87         | Cyb5r<br>2  | cytochrome b5 reductase 2                                | NM_17721<br>6                | NM_00116355<br>7       | chr7                | 11489<br>1969 | 11490<br>1510 |
| 7              | 103641<br>02            | 3.3<br>4          | Chchd<br>10 | coiled-coil-helix-coiled-coil-helix domain containing 10 | NM_17532<br>9                | ENSMUST0000<br>0058906 | chr10               | 75396<br>212  | 75400<br>489  |
| 8              | 105679<br>95            | 3.2<br>94         | Nupr1       | nuclear protein 1                                        | NM_01973<br>8                | ENSMUST0000<br>0032961 | chr7                | 13376<br>6403 | 13376<br>9003 |
| 9              | 104717<br>21            | 3.1<br>6          | Ptgs1       | prostaglandin-endoperoxide synthase 1                    | NM_00896<br>9                | ENSMUST0000<br>0062069 | chr2                | 36085<br>946  | 36107<br>792  |
| 1<br>0         | 104643<br>70            | 3.1<br>38         | Slc18a<br>2 | solute carrier family 18 (vesicular monoamine), member 2 | NM_17252<br>3                | ENSMUST0000<br>0026084 | chr19               | 59335<br>386  | 59370<br>502  |
| 1              | 104844                  | 3.0               | P2rx3       | purinergic receptor P2X, ligand-gated ion channel, 3     | NM_14552                     |                        | chr2                | 84836         | 84875         |

|   |        |     |          |                                                                           |           |                    |       |       |       |
|---|--------|-----|----------|---------------------------------------------------------------------------|-----------|--------------------|-------|-------|-------|
| 1 | 88     | 53  |          |                                                                           | 6         | ENSMUST00000028465 |       | 709   | 991   |
| 1 | 105546 | 3.0 | Stard5   | StAR-related lipid transfer (START) domain containing 5                   | NM_02337  | ENSMUST00000075418 | chr7  | 90780 | 90790 |
| 2 | 93     | 31  |          |                                                                           | 7         |                    |       | 510   | 838   |
| 1 | 103450 | 2.8 | Gsta3    | glutathione S-transferase, alpha 3                                        | NM_00107  | NM_010356          | chr1  | 21230 | 21255 |
| 3 | 65     | 28  |          |                                                                           | 7353      |                    |       | 670   | 640   |
| 1 | 104270 | 2.8 | Nr4a1    | nuclear receptor subfamily 4, group A, member 1                           | NM_01044  | ENSMUST00000023779 | chr15 | 10109 | 10110 |
| 4 | 35     | 28  |          |                                                                           | 4         |                    |       | 7284  | 5226  |
| 1 | 103556 | 2.7 | Cryba2   | crystallin, beta A2                                                       | NM_02154  | ENSMUST00000006721 | chr1  | 74936 | 74939 |
| 5 | 62     | 89  |          |                                                                           | 1         |                    |       | 508   | 709   |
| 1 | 104626 | 2.7 | Ifit1    | interferon-induced protein with tetratricopeptide repeats 1               | NM_00833  | ENSMUST00000102824 | chr19 | 34715 | 34724 |
| 6 | 23     | 51  |          |                                                                           | 1         |                    |       | 379   | 499   |
| 1 | 105075 | 2.7 | Slc6a9   | solute carrier family 6 (neurotransmitter transporter, glycine), member 9 | NM_00813  | ENSMUST00000063857 | chr4  | 11750 | 11754 |
| 7 | 00     | 13  |          |                                                                           | 5         |                    |       | 7111  | 1910  |
| 1 | 103529 | 2.6 | Mir29b-2 | microRNA 29b-2                                                            | NR_029809 | NR_015566          | chr1  | 19686 | 19686 |
| 8 | 16     | 76  |          |                                                                           |           |                    |       |       | 3234  |
| 1 | 103647 | 2.6 | Reep6    | receptor accessory protein 6                                              | NM_13929  | ENSMUST00000105354 | chr10 | 79792 | 79799 |
| 9 | 84     | 57  |          |                                                                           | 2         |                    |       | 903   | 186   |
| 2 | 103500 | 2.6 | Cyb5r1   | cytochrome b5 reductase 1                                                 | NM_02805  | ENSMUST00000027726 | chr1  | 13630 | 13630 |
| 0 | 03     | 39  |          |                                                                           | 7         |                    |       | 2358  | 8315  |
| 2 | 103529 | 2.6 | Mir29c   | microRNA 29c                                                              | NR_029745 | NR_015566          | chr1  | 19686 | 19686 |
| 1 | 18     | 03  |          |                                                                           |           |                    |       |       | 3741  |
| 2 | 105280 | 2.5 | Steap    | six transmembrane epithelial antigen of the prostate 1                    | NM_02739  | ENSMUST0000        | chr5  | 57363 | 57493 |
| 2 | 15     | 67  |          |                                                                           | 9         |                    |       | 20    | 11    |

|        |              |           |          |                                                                                                       |                  |                        |       |               |               |
|--------|--------------|-----------|----------|-------------------------------------------------------------------------------------------------------|------------------|------------------------|-------|---------------|---------------|
|        |              |           | 1        |                                                                                                       |                  | 0015796                |       |               |               |
| 2<br>3 | 104560<br>05 | 2.5<br>49 | Cd74     | CD74 antigen (invariant polypeptide of major histocompatibility complex, class II antigen-associated) | NM_00104<br>2605 | NM_010545              | chr18 | 60963<br>502  | 60983<br>106  |
| 2<br>4 | 104077<br>97 | 2.5<br>32 | Prl2c3   | prolactin family 2, subfamily c, member 3                                                             | NM_01111<br>8    | NM_011954              | chr13 | 12883<br>083  | 12892<br>345  |
| 2<br>5 | 104286<br>19 | 2.4<br>97 | Enpp2    | ectonucleotide pyrophosphatase phosphodiesterase 2                                                    | NM_01574<br>4    |                        | chr15 | 54670<br>220  | 54751<br>664  |
| 2<br>6 | 105729<br>28 | 2.4<br>28 | Rasd2    | RASD family, member 2                                                                                 | NM_02918<br>2    | ENSMUST0000<br>0041083 | chr8  | 77737<br>843  | 77748<br>012  |
| 2<br>7 | 105420<br>93 | 2.4<br>12 | Nrip2    | nuclear receptor interacting protein 2                                                                | NM_02171<br>7    | NM_00116285<br>8       | chr6  | 12834<br>9784 | 12835<br>8950 |
| 2<br>8 | 105171<br>69 | 2.4<br>12 | Sh3bgrl3 | SH3 domain binding glutamic acid-rich protein-like 3                                                  | NM_08055<br>9    | ENSMUST0000<br>0030651 | chr4  | 13368<br>3321 | 13368<br>4668 |
| 2<br>9 | 106059<br>86 | 2.3<br>78 | Slc7a3   | solute carrier family 7 (cationic amino acid transporter, y+ system), member 3                        | NM_00751<br>5    | ENSMUST0000<br>0101362 | chrX  | 98274<br>543  | 98280<br>713  |
| 3<br>0 | 103713<br>32 | 2.3<br>46 | Aldh1l2  | aldehyde dehydrogenase 1 family, member L2                                                            | NM_15354<br>3    | ENSMUST0000<br>0020497 | chr10 | 82950<br>195  | 82996<br>807  |
| 3<br>1 | 105903<br>06 | 2.3<br>46 | Entpd3   | ectonucleoside triphosphate diphosphohydrolase 3                                                      | NM_17867<br>6    | ENSMUST0000<br>0047687 | chr9  | 12044<br>8961 | 12047<br>7435 |
| 3<br>2 | 105660<br>43 | 2.3<br>46 | Lrrc51   | leucine rich repeat containing 51                                                                     | NM_00116<br>2974 | NM_027053              | chr7  | 10906<br>1507 | 10908<br>2320 |
| 3<br>3 | 105078<br>33 | 2.3<br>46 | Nt5c1a   | 5'-nucleotidase, cytosolic IA                                                                         | NM_00108<br>5502 | ENSMUST0000<br>0068262 | chr4  | 12287<br>8801 | 12289<br>3450 |
| 3<br>4 | 105633<br>38 | 2.3<br>46 | Ppp1r15a | protein phosphatase 1, regulatory (inhibitor) subunit 15A                                             | NM_00865<br>4    | ENSMUST0000<br>0042105 | chr7  | 52778<br>290  | 52781<br>583  |

|        |              |           |             |                                                               |                  |                        |       |               |               |
|--------|--------------|-----------|-------------|---------------------------------------------------------------|------------------|------------------------|-------|---------------|---------------|
| 3<br>5 | 104677<br>39 | 2.3<br>29 | Avpi1       | arginine vasopressin-induced 1                                | NM_02710<br>6    | ENSMUST0000<br>0018965 | chr19 | 42197<br>765  | 42203<br>517  |
| 3<br>6 | 105657<br>75 | 2.3<br>29 | Dgat2       | diacylglycerol O-acyltransferase 2                            | NM_02638<br>4    | ENSMUST0000<br>0033001 | chr7  | 10630<br>2168 | 10633<br>1227 |
| 3<br>7 | 105072<br>18 | 2.3<br>13 | Mknk<br>1   | MAP kinase-interacting serine threonine kinase 1              | NM_02146<br>1    |                        | chr4  | 11551<br>1851 | 11555<br>1853 |
| 3<br>8 | 104067<br>36 | 2.2<br>97 | F2rl2       | coagulation factor II (thrombin) receptor-like 2              | NM_01017<br>0    | ENSMUST0000<br>0022182 | chr13 | 96466<br>875  | 96472<br>694  |
| 3<br>9 | 104266<br>56 | 2.2<br>82 | Prph        | peripherin                                                    | NM_01363<br>9    | NM_00116358<br>8       | chr15 | 98885<br>612  | 98889<br>404  |
| 4<br>0 | 103668<br>81 | 2.2<br>66 | Ddit3       | DNA-damage inducible transcript 3                             | NM_00783<br>7    | NM_00117158<br>2       | chr10 | 12672<br>7864 | 12673<br>3344 |
| 4<br>1 | 105187<br>51 | 2.2<br>04 | Car6        | carbonic anhydrase 6                                          | NM_00980<br>2    | ENSMUST0000<br>0030817 | chr4  | 14956<br>1124 | 14957<br>5270 |
| 4<br>2 | 105078<br>26 | 2.2<br>04 | Hpcal<br>4  | hippocalcin-like 4                                            | NM_17499<br>8    | ENSMUST0000<br>0059667 | chr4  | 12286<br>0747 | 12287<br>1942 |
| 4<br>3 | 104035<br>79 | 2.2<br>04 | Prl2c5      | prolactin family 2, subfamily c, member 5                     | NM_18185<br>2    | ENSMUST0000<br>0021778 | chr13 | 13274<br>992  | 13284<br>107  |
| 4<br>4 | 104992<br>47 | 2.1<br>89 | Ntrk1       | neurotrophic tyrosine kinase, receptor, type 1                | NM_00103<br>3124 | NM_011832              | chr3  | 87582<br>166  | 87617<br>892  |
| 4<br>5 | 105476<br>21 | 2.1<br>73 | Apobc<br>c1 | apolipoprotein B mRNA editing enzyme, catalytic polypeptide 1 | NM_03115<br>9    | NM_00113439<br>1       | chr6  | 12252<br>7810 | 12255<br>2462 |
| 4      | 103555       | 2.1       |             | transmembrane BAX inhibitor motif containing 1                | NM_02715         |                        | chr1  | 74334         | 74350         |

|   |        |     |         |                                                                                     |              |                    |       |       |       |
|---|--------|-----|---------|-------------------------------------------------------------------------------------|--------------|--------------------|-------|-------|-------|
| 6 | 67     | 73  | Tmbim1  |                                                                                     | 4            | ENSMUST00000016309 |       | 823   | 734   |
| 4 | 105693 | 2.1 | H19     | H19 fetal liver mRNA                                                                | NR_001592    |                    | chr7  | 14976 | 14976 |
| 7 | 35     | 44  |         |                                                                                     |              |                    |       | 1436  | 2920  |
| 4 | 104749 | 2.1 | Chac1   | ChaC, cation transport regulator-like 1 (E. coli)                                   | NM_026929    | ENSMUST00000028780 | chr2  | 11917 | 11918 |
| 8 | 72     | 29  |         |                                                                                     |              |                    |       | 6992  | 0117  |
| 4 | 103734 | 2.1 | Gm129   | predicted gene 129                                                                  | BC132471     | NM_001033302       | chr10 | 12798 | 12798 |
| 9 | 52     | 29  |         |                                                                                     |              |                    |       | 6956  | 7628  |
| 5 | 104189 | 2.1 | Sncg    | synuclein, gamma                                                                    | NM_011430    | ENSMUST00000023826 | chr14 | 35183 | 35187 |
| 0 | 21     | 29  |         |                                                                                     |              |                    |       | 460   | 846   |
| 5 | 105846 | 2.1 | Thy1    | thymus cell antigen 1, theta                                                        | NM_009382    | ENSMUST00000114840 | chr9  | 43854 | 43856 |
| 1 | 28     | 14  |         |                                                                                     |              |                    |       | 037   | 662   |
| 5 | 104527 | 2.0 | Galnt14 | UDP-N-acetyl-alpha-D-galactosamine:polypeptide N-acetylgalactosaminyltransferase 14 | NM_027864    | ENSMUST00000024858 | chr17 | 73842 | 74059 |
| 2 | 93     | 99  |         |                                                                                     |              |                    |       | 568   | 575   |
| 5 | 103685 | 2.0 | Hey2    | hairy enhancer-of-split related with YRPW motif 2                                   | NM_013904    |                    | chr10 | 30552 | 30562 |
| 3 | 56     | 99  |         |                                                                                     |              |                    |       | 165   | 589   |
| 5 | 104448 | 2.0 | Cdsn    | corneodesmosin                                                                      | NM_001008424 | ENSMUST00000044804 | chr17 | 35689 | 35694 |
| 4 | 83     | 85  |         |                                                                                     |              |                    |       | 073   | 128   |
| 5 | 103544 | 2.0 | Obfc2a  | oligonucleotide oligosaccharide-binding fold containing 2A                          | NM_028696    |                    | chr1  | 51522 | 51535 |
| 5 | 18     | 85  |         |                                                                                     |              |                    |       | 706   | 243   |
| 5 | 105932 | 2.0 | Htr3a   | 5-hydroxytryptamine (serotonin) receptor 3A                                         | NM_013561    | NM_001099644       | chr9  | 48707 | 48719 |
| 6 | 33     | 71  |         |                                                                                     |              |                    |       | 319   | 141   |
| 5 | 105754 | 2.0 | Mtss1l  | metastasis suppressor 1-like                                                        | NM_198625    | ENSMUST00000052457 | chr8  | 11324 | 11326 |
| 7 | 97     | 56  |         |                                                                                     |              |                    |       | 5384  | 5300  |

|    |          |       |          |                                                     |           |                    |       |           |           |
|----|----------|-------|----------|-----------------------------------------------------|-----------|--------------------|-------|-----------|-----------|
| 58 | 10525439 | 2.056 | P2rx4    | purinergic receptor P2X, ligand-gated ion channel 4 | NM_011026 | ENSMUST00000031429 | chr5  | 123157566 | 123179053 |
| 59 | 10463185 | 2.056 | Ubtd1    | ubiquitin domain containing 1                       | NM_145500 | ENSMUST00000026170 | chr19 | 42056253  | 42109133  |
| 60 | 10389022 | 2.042 | Myo1d    | myosin ID                                           | NM_177390 | ENSMUST00000041065 | chr11 | 80297728  | 80371108  |
| 61 | 10347910 | 2.028 | Fbxo36   | F-box protein 36                                    | NM_025386 | ENSMUST00000097672 | chr1  | 84836430  | 84897059  |
| 62 | 10458560 | 2.014 | Fgf1     | fibroblast growth factor 1                          | NM_010197 | ENSMUST00000040647 | chr18 | 38998834  | 39078353  |
| 63 | 10518726 | 2.014 | Slc25a33 | solute carrier family 25, member 33                 | NM_027460 | ENSMUST00000105686 | chr4  | 149118145 | 149148376 |

Supplemental table 2: Genes that are upregulated (>2 fold ratio) by Sunitinib treatment of MPC 4/30 cells.
