# Supplementary material
Source: PubMed Central journal article supplement (PMC4977182)
Supplement: NIHMS4061-supplement-3.pdf [file NIHMS4061-supplement-3.pdf]

| Variable            | Pheo        | Para         |
|---------------------|-------------|--------------|
| <b>Location*</b>    |             |              |
| Carotid body        | -           | 40 (44.9)    |
| Retroperitoneal     | -           | 16 (18)      |
| Spinal              | -           | 6 (6.7)      |
| Jugular             | -           | 4 (4.5)      |
| Zuckerkindl organ   | -           | 3 (3.4)      |
| Parapharyngeal      | -           | 2 (2.2)      |
| Vagal               | -           | 4 (4.5)      |
| Mediastinum         | -           | 1 (1.1)      |
| Periaortic          | -           | 4 (4.5)      |
| Jugulotympanic      | -           | 1 (1.1)      |
| Bladder             | -           | 1 (1.1)      |
| Liver               | -           | 1 (1.1)      |
| Neck (soft tissue)  | -           | 1 (1.1)      |
| Bone metastasis     | -           | 4 (4.5)      |
| Ileal metastasis    | -           | 1 (1.1)      |
| <b>Side†</b>        |             |              |
| Left                | 17 (39.5)   | -            |
| Right               | 26 (60.5)   | -            |
| Weight‡ (grams)     | 145.7 ± 493 | 61.1 ± 154.1 |
| Size¶ (centimetres) | 5.4 ± 3.1   | 4.1 ± 2.4    |

Supplemental table 3: Tumour characteristics. Numbers in brackets indicate percentage of an absolute number.

\* All pheochromocytomas were originated in the adrenal gland.

† The side of tumour was only considered for the pheochromocytomas.

‡ The weight was available for 39 cases of pheochromocytomas and 31 cases of paragangliomas.

¶ The size was available for 40 cases of pheochromocytomas and 75 cases of paragangliomas.
